# Supplementary material for: Circ-GALNT16 restrains colorectal cancer progression by enhancing the SUMOylation of hnRNPK
Source: PubMed Central journal article supplement (PMC8400830; doi:10.1186/s13046-021-02074-7), 2021-08-27

**A**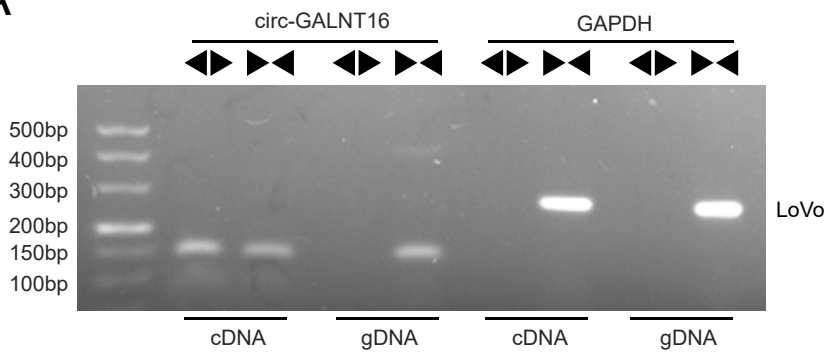**B**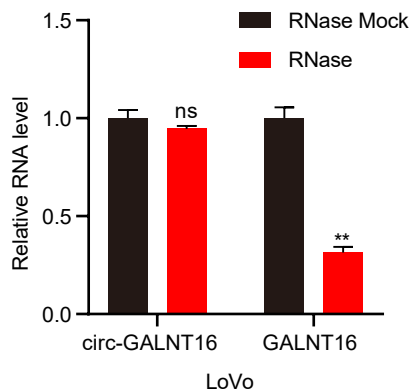**C**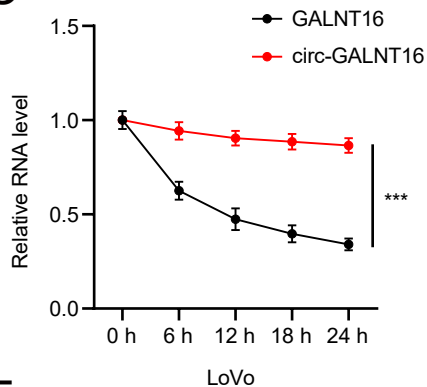**D**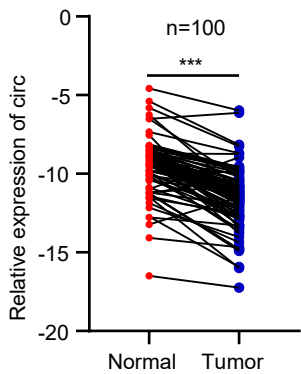**E**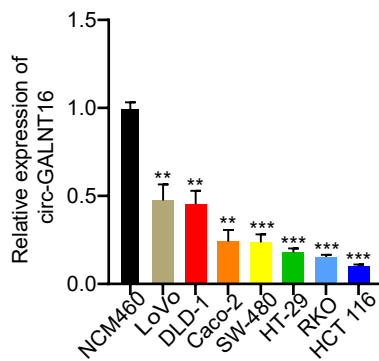**F**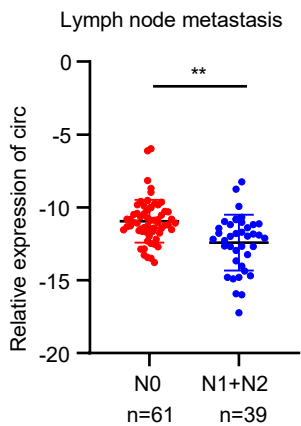

Supplement: 13046_2021_2074_MOESM2_ESM.pdf [file 13046_2021_2074_MOESM2_ESM.pdf]
