# Supplementary material for: Circ-GALNT16 restrains colorectal cancer progression by enhancing the SUMOylation of hnRNPK
Source: Springer Nature journal article supplement (doi:10.1186/s13046-021-02074-7), 2021-08-27

**A**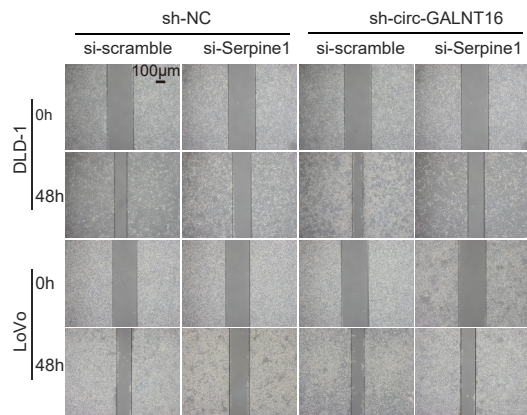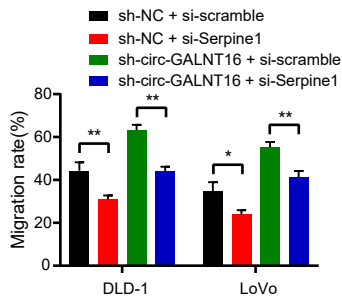**B**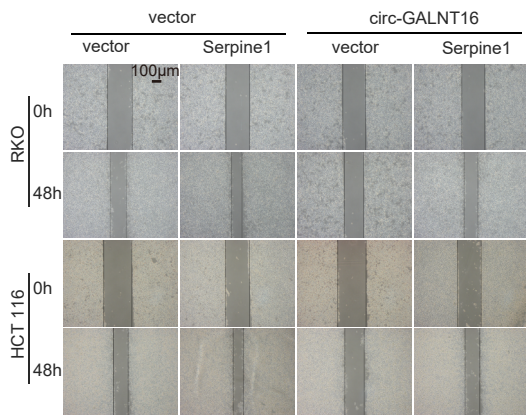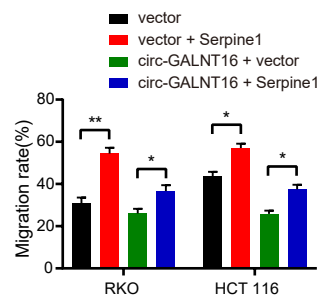**C**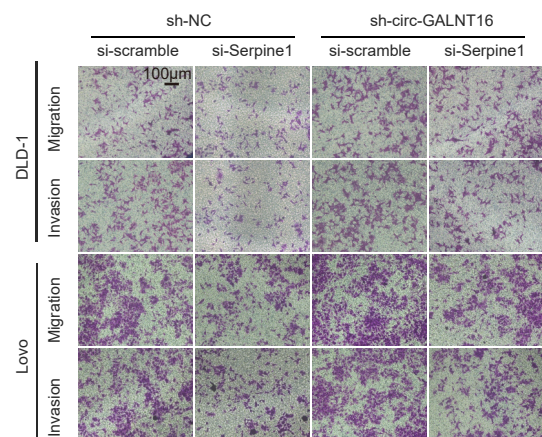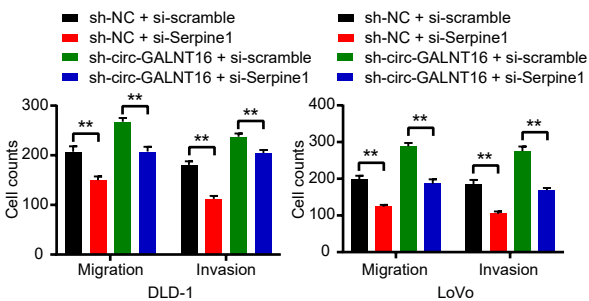**D**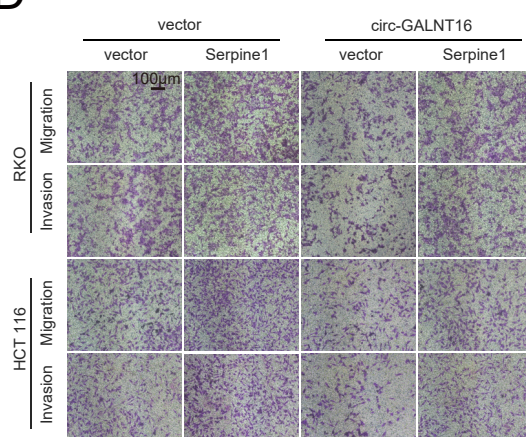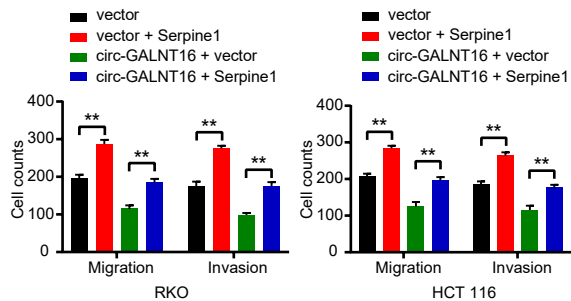

Supplement: MOESM9 [file 19606576]
