# Supplementary material for: Circ-GALNT16 restrains colorectal cancer progression by enhancing the SUMOylation of hnRNPK
Source: J Exp Clin Cancer Res. 2021 Aug 27;40:272. doi: 10.1186/s13046-021-02074-7 (PMC8400830; doi:10.1186/s13046-021-02074-7)
Supplement: Supplementary file 4 — Additional file 4: Figure S4. Circ-GALNT16 could specifically interact with hnRNPK in the nucleus and suppress the proliferation and metastasis through binding to hnRNPK. a. MS analysis results of hnRNPK. b. The knockdown efficiency of hnRNPK. c. Pulldown and silver staining performed in nucleoprotein of DLD-1 cells. d, e. CCK8 and transwell showed that circ-GALNT16 suppressed the proliferation and metastasis of CRC by interacting with hnRNPK. f. The mRNA expression level of hnRNPK in circ-GALNT16 knockdown and overexpression cells. All data are presented as the means ± SD of three independent experiments. nsp >0.05, *p < 0.05, **p < 0.01. [file 13046_2021_2074_MOESM4_ESM.pdf]

Relative expression of hnRNPK

si-scramble

si-hnRNPK

DLD-1 LoVo RKO HCT 116

| Cell Line | si-scramble | si-hnRNPK |
|-----------|-------------|-----------|
| DLD-1     | 1.0         | ~0.4**    |
| LoVo      | 1.0         | ~0.45**   |
| RKO       | 1.0         | ~0.25**   |
| HCT 116   | 1.0         | ~0.25**   |

|         | DLD-1       |            | LoVo        |            | RKO         |            | HCT 116     |            |       |
|---------|-------------|------------|-------------|------------|-------------|------------|-------------|------------|-------|
|         | si-scramble | si-hnRNP K |       |
| hnRNP K |             |            |             |            |             |            |             |            | 60kDa |
| GAPDH   |             |            |             |            |             |            |             |            | 36kDa |

**E**

|       |           | si-scramble |         | si-hnRNPK |         |
|-------|-----------|-------------|---------|-----------|---------|
|       |           | sh-NC       | sh-circ | sh-NC     | sh-circ |
| DLD-1 | Migration |             |         |           |         |
|       | Invasion  |             |         |           |         |
| LoVo  | Migration |             |         |           |         |
|       | Invasion  |             |         |           |         |

100μm

Cell counts

300

200

100

0

Migration Invasion

DLD-1

300

200

100

0

Migration Invasion

LoVo

si-scramble + sh-NC

si-scramble + sh-circ-GALNT16

si-hnRNPK + sh-NC

si-hnRNPK + sh-circ-GALNT16

\*

ns

\*\*

ns

\*\*

ns

Figure 3 consists of two line graphs showing cell growth (CCK8 OD450nm) over 5 days for DLD-1 and LoVo cells. The legend indicates four conditions: si-scramble + sh-NC (black line), si-scramble + sh-circ-GALNT16 (red line), si-hnRNPK + sh-NC (green line), and si-hnRNPK + sh-circ-GALNT16 (blue line). In both cell lines, growth is significantly inhibited by sh-circ-GALNT16 compared to sh-NC, and this inhibition is partially rescued by co-treatment with si-hnRNPK. Statistical significance is indicated by brackets: \*\* (p < 0.01) and ns (not significant).

| Cell Line | Day | si-scramble + sh-NC | si-scramble + sh-circ-GALNT16 | si-hnRNPK + sh-NC | si-hnRNPK + sh-circ-GALNT16 |
|-----------|-----|---------------------|-------------------------------|-------------------|-----------------------------|
| DLD-1     | 1   | 0.25                | 0.25                          | 0.25              | 0.25                        |
|           | 2   | 0.35                | 0.35                          | 0.40              | 0.40                        |
|           | 3   | 0.60                | 0.70                          | 0.75              | 0.75                        |
|           | 4   | 0.95                | 1.25                          | 1.45              | 1.45                        |
|           | 5   | 1.40                | 1.95                          | 2.15              | 2.15                        |
| LoVo      | 1   | 0.20                | 0.20                          | 0.20              | 0.20                        |
|           | 2   | 0.35                | 0.40                          | 0.45              | 0.45                        |
|           | 3   | 0.50                | 0.65                          | 0.70              | 0.70                        |
|           | 4   | 0.70                | 0.95                          | 1.05              | 1.05                        |
|           | 5   | 1.05                | 1.55                          | 1.75              | 1.75                        |

**F**

Figure F consists of two bar charts. The left chart shows the relative expression of hnRNP K in DLD-1 and Lovo cells after treatment with sh-NC (black bars), sh-circ-GALNT16#1 (red bars), and sh-circ-GALNT16#2 (orange bars). The y-axis is labeled 'Relative expression of hnRNP K' and ranges from 0.0 to 1.5. The x-axis has two groups: DLD-1 and Lovo. In both groups, the expression levels are similar across the three treatments, with 'ns' (not significant) indicated above the bars. The right chart shows the relative expression of hnRNP K in RKO and HCT-116 cells after treatment with vector (black bars) and circ-GALNT16 (blue bars). The y-axis is labeled 'Relative expression of hnRNP K' and ranges from 0.0 to 1.5. The x-axis has two groups: RKO and HCT-116. In both groups, the expression levels are similar, with 'ns' (not significant) indicated above the bars.

Relative expression of hnRNP K

sh-NC  
sh-circ-GALNT16#1  
sh-circ-GALNT16#2

DLD-1 Lovo

Relative expression of hnRNP K

vector  
circ-GALNT16

RKO HCT-116
