# Supplementary material for: Circ-GALNT16 restrains colorectal cancer progression by enhancing the SUMOylation of hnRNPK
Source: J Exp Clin Cancer Res. 2021 Aug 27;40:272. doi: 10.1186/s13046-021-02074-7 (PMC8400830; doi:10.1186/s13046-021-02074-7)
Supplement: Supplementary file 11 — Additional file 11: Table S1. The differential expression circRNAs in CRC tissues according to the circRNA microarray. [file 13046_2021_2074_MOESM11_ESM.xlsx]

## Sheet: Sheet1
Table S1：the differential circRNAs in CRC tissues according to the circRNA microarray
ProbeName	p value	FC (abs)	Regulation	T1:gProcessedSignal(normalized)	T2:gProcessedSignal(normalized)	T3:gProcessedSignal(normalized)	T4:gProcessedSignal(normalized)	T5:gProcessedSignal(normalized)	N1:gProcessedSignal(normalized)	N2:gProcessedSignal(normalized)	N3:gProcessedSignal(normalized)	N4:gProcessedSignal(normalized)	N5:gProcessedSignal(normalized)	circRNAID	circbase ID
hsa_circ_0052184_CBC1	0.00047299	4.94202	up	0.689559	0.701695	1.4055	1.29203	-0.578546	-1.83637	-1.67885	-0.799529	-1.85456	-1.84595	hsa_circ_0052184	hsa_circ_0052184
hsa_circ_0124554_CBC1	0.00584444	4.12664	up	0.38673	0.448227	1.72011	1.55949	1.86536	0.385849	-1.26579	-1.60857	-1.79671	0.0403096	hsa_circ_0124554	hsa_circ_0124554
hsa_circ_0008234_CBC1	0.00292402	3.87041	up	0.667144	0.9743	1.87839	1.98511	2.3862	-1.48475	-0.496732	0.44144	0.135746	-0.466991	hsa_circ_0008234	hsa_circ_0008234
hsa_circ_0055087_CBC1	0.00401251	3.48929	up	1.47167	0.536358	1.35828	1.1167	0.584097	0.429726	-1.46437	-0.925574	-1.79706	-0.190275	hsa_circ_0055087	hsa_circ_0055087
hsa_circ_0044621_CBC1	0.00204152	3.1161	up	0.982642	0.979715	0.102412	0.830991	1.25933	-1.55951	-1.0022	0.298808	-1.08083	-0.699891	hsa_circ_0044621	hsa_circ_0044621
hsa_circ_0079875_CBC1	0.00237407	2.84462	up	0.940678	1.23595	1.71637	1.23039	0.523017	-0.602138	-1.15361	-0.570392	-0.113702	0.545077	hsa_circ_0079875	hsa_circ_0079875
hsa_circ_0002103_CBC1	0.00419653	2.80346	up	0.797384	0.665806	0.0855248	1.83604	0.0852206	-0.414216	-1.24098	-0.364996	-1.27035	-0.675522	hsa_circ_0002103	hsa_circ_0002103
hsa_circ_0122790_CBC1	0.00558297	2.79028	up	0.906152	0.740398	0.382251	0.420334	1.294	-1.43019	-0.140984	-1.36115	0.357683	-1.08428	hsa_circ_0122790	hsa_circ_0122790
hsa_circ_0128882_CBC1	0.00168142	2.73418	up	0.928635	0.867549	1.32109	1.52965	0.831992	-0.286028	-0.716331	-0.258347	-1.09756	0.581656	hsa_circ_0128882	hsa_circ_0128882
hsa_circ_0139778_CBC1	0.000637101	2.68774	up	2.34065	2.4637	3.11082	2.7978	3.3251	1.6062	0.893893	0.973912	1.8029	1.6292	hsa_circ_0139778	hsa_circ_0139778
hsa_circ_0005241_CBC1	0.00436816	2.68378	up	0.803337	1.55343	1.01016	1.06221	1.17577	-1.00778	-0.555857	-0.930542	0.25007	0.727684	hsa_circ_0005241	hsa_circ_0005241
hsa_circ_0047294_CBC1	0.00146411	2.65739	up	1.36728	0.977309	1.32829	0.998888	0.730125	-0.191346	0.341413	0.0195507	-1.24332	-0.57447	hsa_circ_0047294	hsa_circ_0047294
hsa_circ_0019201_CBC1	0.00441824	2.5879	up	0.761459	0.618361	0.259965	1.28627	0.651764	0.399985	-1.23046	-0.486754	-1.3091	-0.654768	hsa_circ_0019201	hsa_circ_0019201
hsa_circ_0086587_CBC1	0.00916554	2.52741	up	0.401533	1.27183	1.05098	1.56581	1.29032	-0.370746	0.259797	0.797894	-1.11132	-0.683453	hsa_circ_0086587	hsa_circ_0086587
hsa_circ_0112470_CBC1	0.00314536	2.32957	up	0.824834	0.837718	1.01459	1.6782	0.967616	0.144327	0.384736	0.133149	-0.961907	-0.47768	hsa_circ_0112470	hsa_circ_0112470
hsa_circ_0009582_CBC1	0.00646016	2.30075	up	0.855388	1.03858	0.678832	0.561339	0.762487	-0.021271	0.127449	-1.48429	0.0997173	-0.835507	hsa_circ_0009582	hsa_circ_0009582
hsa_circ_0108120_CBC1	0.00323515	2.29117	up	1.17393	1.45747	0.955618	1.62194	1.17485	0.356531	-0.271932	0.756343	-0.745035	0.307471	hsa_circ_0108120	hsa_circ_0108120
hsa_circ_0074185_CBC1	0.00866101	2.26368	up	1.50902	0.908915	0.508443	1.28898	-0.185239	-0.0406893	-0.110726	-0.240411	-0.911381	-0.560012	hsa_circ_0074185	hsa_circ_0074185
hsa_circ_0025535_CBC1	0.0021508	2.1858	up	1.35039	1.15642	2.0177	1.69496	1.18624	0.942882	0.326535	-0.143645	0.590771	0.0483545	hsa_circ_0025535	hsa_circ_0025535
hsa-circRNA10763-27_CBC1	0.00289919	2.16203	up	1.26245	1.05711	1.26765	1.73208	1.28337	-0.00180486	0.253523	0.845977	-0.564982	0.508015	hsa-circRNA10763-27
hsa_circ_0122866_CBC1	0.00398576	2.14997	up	1.39075	1.10794	1.15765	1.13809	1.30855	0.1643	0.787922	0.245545	-0.873314	0.256956	hsa_circ_0122866	hsa_circ_0122866
hsa_circ_0018493_CBC1	0.00161262	2.1426	up	0.865054	1.05861	1.34227	1.58952	0.655424	0.337411	-0.154687	0.00362464	-0.536261	0.363968	hsa_circ_0018493	hsa_circ_0018493
hsa-circRNA15684-3_CBC1	0.000119966	2.1391	up	1.20608	0.655409	0.708699	1.05427	1.21105	0.267833	-0.226057	-0.220138	-0.319505	-0.151652	hsa-circRNA15684-3
hsa_circ_0066213_CBC1	0.000698713	2.12971	up	0.974027	1.0225	1.52922	1.36548	1.19607	0.626269	-0.25924	0.441853	-0.20916	0.0342691	hsa_circ_0066213	hsa_circ_0066213
hsa_circ_0037120_CBC1	0.00275605	2.11456	up	0.786616	0.703349	1.42725	1.67723	0.764029	-0.264422	-0.119431	0.471356	-0.353674	0.222872	hsa_circ_0037120	hsa_circ_0037120
hsa_circ_0027657_CBC1	0.00204843	2.10433	up	1.17248	0.883897	1.2059	1.47031	0.865538	-0.0974393	0.499614	0.391947	-0.689397	0.126604	hsa_circ_0027657	hsa_circ_0027657
hsa_circ_0113022_CBC1	0.000508177	2.1003	up	0.813396	0.949604	1.60163	1.36696	1.2454	0.214648	0.344985	-0.0139109	-0.304586	0.382879	hsa_circ_0113022	hsa_circ_0113022
hsa_circ_0064988_CBC1	0.00923688	2.09586	up	1.07127	1.01272	1.33559	0.409754	1.2023	0.00380786	-1.0274	0.168106	-0.0704781	0.619899	hsa_circ_0064988	hsa_circ_0064988
hsa_circ_0029766_CBC1	0.00571179	2.09347	up	0.626569	1.18062	1.88369	2.02672	1.19732	0.475832	0.732737	0.121701	0.0800659	0.175099	hsa_circ_0029766	hsa_circ_0029766
hsa_circ_0017784_CBC1	0.00295263	2.06036	up	1.37181	1.08404	1.47142	1.98851	1.04211	0.510578	0.677804	0.720416	-0.0499262	-0.115451	hsa_circ_0017784	hsa_circ_0017784
hsa-circRNA14414_CBC1	0.00649739	2.03847	up	0.984821	1.27117	1.37424	0.896637	0.829915	0.826179	-0.247186	-0.0579244	-0.686701	0.384993	hsa-circRNA14414
hsa_circ_0118943_CBC1	0.00914139	2.03732	up	0.870158	0.863401	1.26772	0.990593	-0.14161	0.182497	-0.9115	-0.186045	-0.291621	-0.0764184	hsa_circ_0118943	hsa_circ_0118943
hsa_circ_0097743_CBC1	0.000727171	2.00132	up	0.880011	0.646954	0.89278	1.62007	1.44248	0.0418509	0.0281732	0.0345318	0.208949	0.164026	hsa_circ_0097743	hsa_circ_0097743
hsa_circ_0046136_CBC1	0.00775313	12.204	down	-1.57208	0.250459	-1.24134	-1.08771	0.753406	2.20625	0.0105825	3.16367	4.66841	5.10025	hsa_circ_0046136	hsa_circ_0046136
hsa_circ_0006457_CBC1	0.0011476	7.98281	down	-1.4693	-1.13966	-0.393606	-1.00752	-0.545713	0.437621	1.77268	1.59137	2.79445	3.83256	hsa_circ_0006457	hsa_circ_0006457
hsa_circ_0138252_CBC1	0.00356427	6.08408	down	-1.57208	-1.8546	-0.461507	-1.08771	0.555096	0.62242	0.786533	1.63945	3.05203	2.50395	hsa_circ_0138252	hsa_circ_0138252
hsa_circ_0010620_CBC1	0.0083744	5.7051	down	-0.460389	1.3201	-1.24134	-1.08771	0.812235	1.91997	1.06343	1.82911	3.20584	3.8858	hsa_circ_0010620	hsa_circ_0010620
hsa_circ_0102495_CBC1	0.000226375	5.19729	down	-0.209092	-1.53371	-1.24134	-1.08771	-0.599699	0.498203	1.21984	1.68147	2.28119	1.53653	hsa_circ_0102495	hsa_circ_0102495
hsa_circ_0031143_CBC1	0.0073545	5.08963	down	-1.26971	-0.0974514	0.961803	-0.693363	0.780803	1.07859	1.17901	2.41879	3.38654	3.35696	hsa_circ_0031143	hsa_circ_0031143
hsa_circ_0048545_CBC1	0.00313221	5.05117	down	-1.57208	-0.316595	-0.00748507	-1.08771	0.656148	1.27411	0.765404	1.78553	2.76133	2.769	hsa_circ_0048545	hsa_circ_0048545
hsa_circ_0071729_CBC1	0.00767097	4.95372	down	-1.57208	-0.28169	0.393674	-1.08771	0.672684	0.947545	0.74541	1.96765	3.33118	2.67565	hsa_circ_0071729	hsa_circ_0071729
hsa_circ_0029477_CBC1	0.00608324	4.88461	down	-1.40801	-0.452179	-1.24134	-0.947521	0.831339	0.209102	1.09854	1.6059	2.75652	2.55344	hsa_circ_0029477	hsa_circ_0029477
hsa_circ_0079250_CBC1	0.00924468	4.83348	down	-0.406973	0.791957	-0.456754	-0.543201	1.82555	1.28077	1.7803	2.35051	3.89133	3.27298	hsa_circ_0079250	hsa_circ_0079250
hsa_circ_0026959_CBC1	0.0014307	4.8002	down	1.08292	1.42562	0.405779	-0.0983759	1.36623	2.3635	2.2163	3.27431	4.25843	3.38511	hsa_circ_0026959	hsa_circ_0026959
hsa_circ_0060379_CBC1	0.00510995	4.78676	down	-0.721379	0.723175	1.00853	-1.08771	0.972589	1.84406	1.2886	2.6124	3.36348	3.08191	hsa_circ_0060379	hsa_circ_0060379
hsa-circRNA2193-3_CBC1	0.000878913	4.58437	down	-0.181338	0.0877495	-0.402382	-0.827432	-0.368431	0.708028	1.17138	2.17808	2.88691	2.34739	hsa-circRNA2193-3
hsa_circ_0011466_CBC1	0.0028363	4.51266	down	1.39978	0.515913	-0.635379	-1.08771	0.68662	2.21177	1.63327	2.15049	2.86549	2.8881	hsa_circ_0011466	hsa_circ_0011466
hsa-circRNA13121-9_CBC1	0.00117059	4.41244	down	-1.57208	-1.75629	-1.24134	-1.08771	-0.457234	-0.321214	0.57475	1.13085	1.87261	1.33623	hsa-circRNA13121-9
hsa_circ_0022311_CBC1	0.00030577	4.36044	down	-0.304408	-0.918887	-0.621603	-0.642061	-0.933649	0.921442	0.523078	1.40547	2.2243	2.12747	hsa_circ_0022311	hsa_circ_0022311
hsa_circ_0066705_CBC1	0.00566271	4.30145	down	1.94112	2.15856	1.97355	0.482663	3.01674	3.0833	3.18197	4.25422	5.08178	4.49548	hsa_circ_0066705	hsa_circ_0066705
hsa_circ_0048566_CBC1	0.00291806	4.27176	down	1.20059	1.61141	1.55771	0.563283	2.3229	2.58916	2.68073	3.57171	4.48364	4.40481	hsa_circ_0048566	hsa_circ_0048566
hsa-circRNA11922-8_CBC1	0.00908851	4.20284	down	1.33963	1.42618	-0.986823	-0.182433	1.22131	1.52325	2.08798	2.87691	3.35846	3.32809	hsa-circRNA11922-8
hsa_circ_0011131_CBC1	0.00823953	4.18582	down	-0.151284	0.979256	0.0377221	-1.08771	1.0715	1.57969	0.975388	2.30183	3.40192	2.9182	hsa_circ_0011131	hsa_circ_0011131
hsa_circ_0055072_CBC1	0.00599511	4.07464	down	0.761329	-0.140166	-1.20704	-1.08771	0.925643	1.42247	0.977906	1.97894	2.81074	2.19536	hsa_circ_0055072	hsa_circ_0055072
hsa_circ_0010666_CBC1	0.00571306	4.06236	down	-0.385667	-0.708669	-1.24134	-0.481918	-0.415166	1.01218	0.240023	0.684886	1.74755	3.19419	hsa_circ_0010666	hsa_circ_0010666
hsa_circ_0037798_CBC1	0.00252417	4.05311	down	-1.57208	-1.13535	-0.983516	-1.08771	0.101972	1.02312	0.198536	0.335485	2.0469	1.81442	hsa_circ_0037798	hsa_circ_0037798
hsa_circ_0092517_CBC1	0.000954794	4.04235	down	-1.00861	-1.13961	-0.619566	-1.08771	0.440632	0.476181	1.14515	1.31486	2.0545	1.67042	hsa_circ_0092517	hsa_circ_0092517
hsa_circ_0109235_CBC1	0.00599244	4.03674	down	-1.57208	0.444884	-1.24134	0.692575	-1.04841	1.26789	1.87138	0.492281	2.12286	1.58716	hsa_circ_0109235	hsa_circ_0109235
hsa_circ_0009130_CBC1	0.000463328	4.0313	down	-0.673473	-1.36618	-1.00979	-1.08771	-0.160789	0.920769	0.388696	0.937719	2.10206	1.40905	hsa_circ_0009130	hsa_circ_0009130
hsa_circ_0089247_CBC1	0.00580963	3.97865	down	-0.1645	0.298485	-0.868328	-0.115041	-0.885371	0.0377541	1.41475	1.51759	2.80472	2.45182	hsa_circ_0089247	hsa_circ_0089247
hsa_circ_0010621_CBC1	0.000715801	3.94534	down	-1.57208	-0.468011	-0.495021	-1.08771	-0.439659	0.527786	0.681398	0.940631	2.12033	1.56811	hsa_circ_0010621	hsa_circ_0010621
hsa_circ_0049055_CBC1	0.00450091	3.92457	down	0.142594	0.771428	-0.271314	-1.08771	1.14186	1.23526	1.66812	1.99571	2.76512	2.89533	hsa_circ_0049055	hsa_circ_0049055
hsa_circ_0063250_CBC1	0.0092181	3.91154	down	1.41198	2.21543	0.387342	0.252174	1.65409	1.951	2.38886	3.41656	4.37578	3.62749	hsa_circ_0063250	hsa_circ_0063250
hsa-circRNA7995-20_CBC1	0.0019179	3.87528	down	-1.57208	-1.77708	-1.24134	-1.08771	-1.19385	0.986018	-0.686806	-0.0825572	1.25097	1.43182	hsa-circRNA7995-20
hsa-circRNA15546-10_CBC1	0.00197258	3.85703	down	-0.398893	-0.226184	-1.24134	-1.08771	-0.523489	0.450533	0.369419	1.60417	1.41506	2.42065	hsa-circRNA15546-10
hsa-circRNA7845-11_CBC1	0.00165472	3.8569	down	-1.28698	-0.719455	-1.24134	-1.08771	-0.594171	0.594109	-0.0848055	0.878072	2.3293	1.09088	hsa-circRNA7845-11
hsa_circ_0001825_CBC1	0.00278419	3.84412	down	-0.594982	0.299798	-1.24134	-1.08771	-0.454843	0.544619	2.1142	1.37123	0.448459	2.15569	hsa_circ_0001825	hsa_circ_0001825
hsa_circ_0078876_CBC1	0.000833681	3.83	down	0.352265	-0.61166	-1.24134	-1.08771	-0.398107	0.964707	0.83224	1.41171	1.26716	2.22436	hsa_circ_0078876	hsa_circ_0078876
hsa_circ_0065849_CBC1	0.00976271	3.80515	down	-1.38064	-1.34659	-1.17668	-1.08771	0.313545	0.125057	-0.335895	1.38805	2.23754	1.54693	hsa_circ_0065849	hsa_circ_0065849
hsa_circ_0008106_CBC1	0.00153503	3.77417	down	-0.495338	0.806818	-1.24134	-0.530627	-0.470253	1.41494	0.871827	1.55706	1.45605	2.35017	hsa_circ_0008106	hsa_circ_0008106
hsa_circ_0106242_CBC1	0.00312879	3.75386	down	0.218057	0.958453	-0.0476927	-0.397953	0.568924	2.0944	0.876755	1.90055	2.99245	2.97751	hsa_circ_0106242	hsa_circ_0106242
hsa_circ_0029532_CBC1	0.000697072	3.72628	down	-0.483125	-0.155586	-1.24134	-1.08771	-0.418918	0.628776	0.599946	1.51409	1.21967	2.13952	hsa_circ_0029532	hsa_circ_0029532
hsa_circ_0036770_CBC1	0.00398086	3.68948	down	-0.620131	-0.253058	-1.24134	-1.08771	-0.345739	0.13624	0.245068	1.36743	1.81112	2.30926	hsa_circ_0036770	hsa_circ_0036770
hsa_circ_0044125_CBC1	0.00138026	3.68452	down	-1.57208	-0.98985	-0.141302	-1.08771	-1.00766	-0.119664	0.533139	1.15262	1.42444	1.61824	hsa_circ_0044125	hsa_circ_0044125
hsa_circ_0023343_CBC1	0.00484419	3.65891	down	0.622773	1.4382	-0.2925	0.486642	1.05076	1.6595	1.90757	2.18061	3.33844	3.57683	hsa_circ_0023343	hsa_circ_0023343
hsa_circ_0062557_CBC1	0.00660512	3.6181	down	-0.234804	0.106072	0.18209	-1.08771	0.862489	1.40254	0.695541	1.595	2.95234	2.45888	hsa_circ_0062557	hsa_circ_0062557
hsa_circ_0025855_CBC1	0.00872779	3.5783	down	-1.57208	-1.20042	0.046504	-0.466864	-1.15093	-0.0856172	0.215381	0.853208	2.40929	1.46033	hsa_circ_0025855	hsa_circ_0025855
hsa-circRNA3882-7_CBC1	0.00153744	3.52614	down	0.596678	-0.122555	-1.24134	-0.708764	-0.116548	1.00189	1.24556	1.31764	2.34606	1.58676	hsa-circRNA3882-7
hsa_circ_0049054_CBC1	0.00943026	3.51207	down	2.46652	3.28373	2.38908	2.06985	4.05632	3.78522	3.77991	4.77483	5.76323	5.22392	hsa_circ_0049054	hsa_circ_0049054
hsa_circ_0075405_CBC1	0.00077841	3.46184	down	-1.14678	-0.39476	-1.24134	-0.210153	-0.168569	1.22593	1.60403	0.660382	1.78405	0.521701	hsa_circ_0075405	hsa_circ_0075405
hsa_circ_0036105_CBC1	0.00285261	3.44711	down	-0.284956	0.0613834	0.622705	-1.08771	0.756882	1.05425	1.39215	2.10388	2.49923	1.94572	hsa_circ_0036105	hsa_circ_0036105
hsa_circ_0010661_CBC1	0.00617063	3.44391	down	-0.420959	-1.23611	-0.827214	-1.08771	0.00117209	0.213429	0.17908	0.822626	1.85852	2.27575	hsa_circ_0010661	hsa_circ_0010661
hsa_circ_0116884_CBC1	0.00238307	3.42659	down	-1.46871	-0.200726	-1.24134	-1.08771	-0.412643	0.029607	1.70005	1.0987	1.39589	0.248502	hsa_circ_0116884	hsa_circ_0116884
hsa_circ_0028718_CBC1	0.000824125	3.41895	down	-1.23253	-1.64403	-1.24134	-1.08771	-0.416195	1.09503	-0.306977	1.17935	0.378985	0.89958	hsa_circ_0028718	hsa_circ_0028718
hsa_circ_0063813_CBC1	0.00540962	3.40169	down	-0.39648	-0.244211	-1.24134	-0.844471	-0.478832	-0.165964	0.755349	0.878128	1.93324	2.22516	hsa_circ_0063813	hsa_circ_0063813
hsa-circRNA13390-37_CBC1	0.00438706	3.39731	down	1.52334	0.884331	0.109072	-0.358416	1.18249	1.70526	1.84959	2.52792	2.94934	3.13067	hsa-circRNA13390-37
hsa_circ_0049322_CBC1	0.00356854	3.38626	down	-1.57208	0.0756961	-1.24134	-1.08771	-0.142593	0.674283	0.0870292	1.45893	0.898887	1.71129	hsa_circ_0049322	hsa_circ_0049322
hsa_circ_0031515_CBC1	0.00012035	3.37737	down	-1.12457	-0.9739	-1.24134	-1.08771	-1.24487	0.151574	-0.0592191	0.822314	1.26299	0.929447	hsa_circ_0031515	hsa_circ_0031515
hsa-circRNA13378-1_CBC1	0.00203681	3.36831	down	1.90528	2.69982	2.10005	1.54742	2.72552	3.62308	3.15619	3.59612	4.86653	4.49629	hsa-circRNA13378-1
hsa_circ_0038882_CBC1	0.000387289	3.35959	down	0.0225818	-1.27751	-1.17515	-1.08771	-0.413532	0.452054	1.39524	0.798762	1.16203	1.00203	hsa_circ_0038882	hsa_circ_0038882
hsa-circRNA12714-10_CBC1	0.00507769	3.35904	down	0.182627	0.0167998	-0.571347	-1.08771	1.06035	1.26881	0.85545	1.70231	2.12745	2.38694	hsa-circRNA12714-10
hsa_circ_0051563_CBC1	0.00560665	3.30979	down	-1.57208	-0.656564	-0.721968	-1.08771	0.410702	0.0217738	0.511471	1.2816	1.82755	1.36368	hsa_circ_0051563	hsa_circ_0051563
hsa-circRNA4010-22_CBC1	0.00596138	3.29676	down	-1.57208	-0.569442	-1.00629	-0.954793	0.422427	0.745222	0.574873	0.42531	2.23986	0.939799	hsa-circRNA4010-22
hsa_circ_0049231_CBC1	0.00746106	3.28815	down	2.66072	2.37984	1.31245	1.49131	2.42184	4.13746	2.34037	3.51336	4.2375	4.62384	hsa_circ_0049231	hsa_circ_0049231
hsa-circRNA12095-6_CBC1	9.99374e-05	3.25954	down	-1.57208	-0.759911	-1.24134	-1.08771	-0.439229	0.540999	0.217558	0.842383	1.00244	0.819679	hsa-circRNA12095-6
hsa_circ_0055199_CBC1	0.000342319	3.25326	down	-1.12901	0.0173449	-1.24134	-0.666983	-0.465046	0.630676	0.799093	1.33094	0.765846	1.49783	hsa_circ_0055199	hsa_circ_0055199
hsa-circRNA13493_CBC1	0.00663158	3.24334	down	2.65124	3.06563	3.10346	2.49791	3.55511	3.58428	4.12676	4.28747	5.70866	5.65359	hsa-circRNA13493
hsa_circ_0062409_CBC1	0.00621517	3.2375	down	1.62076	1.42873	1.57938	1.1137	2.63826	2.64193	2.59755	3.03875	4.31971	4.25729	hsa_circ_0062409	hsa_circ_0062409
hsa_circ_0007923_CBC1	0.00979578	3.22518	down	-0.994577	0.0403426	0.689976	-1.08771	0.134902	0.500557	1.05564	1.16575	1.91788	2.58999	hsa_circ_0007923	hsa_circ_0007923
hsa-circRNA7860-14_CBC1	0.00127414	3.21976	down	0.487222	0.54533	-0.616704	-0.964497	-0.382289	1.1247	1.05907	1.83427	1.60525	1.88055	hsa-circRNA7860-14
hsa_circ_0123932_CBC1	0.0070288	3.21085	down	-0.538465	0.07055	-1.24134	-0.225232	0.863587	1.5249	1.24803	0.509045	2.46337	1.59852	hsa_circ_0123932	hsa_circ_0123932
hsa_circ_0040043_CBC1	0.00909869	3.18831	down	-0.920334	0.635652	-1.24134	-1.08771	-0.298134	0.120105	0.862667	0.958758	2.26715	1.24341	hsa_circ_0040043	hsa_circ_0040043
hsa_circ_0066439_CBC1	0.00178371	3.17965	down	-0.92988	0.0777362	-1.24134	0.230182	-0.0355211	1.06885	1.86052	0.70936	1.69012	1.11666	hsa_circ_0066439	hsa_circ_0066439
hsa_circ_0115077_CBC1	0.00883359	3.16353	down	0.0189292	1.01764	0.422053	-0.0772038	1.17812	1.06306	1.65438	2.01694	3.41888	2.71396	hsa_circ_0115077	hsa_circ_0115077
hsa_circ_0046972_CBC1	0.00448405	3.16081	down	-0.134394	0.876408	-1.24134	-1.08771	-0.201206	0.658992	1.42511	1.41849	1.79779	1.21285	hsa_circ_0046972	hsa_circ_0046972
hsa_circ_0019978_CBC1	0.00403271	3.15957	down	-0.536759	-0.193605	-0.875223	-1.08771	0.794164	1.03525	0.420526	1.55379	1.87812	1.51182	hsa_circ_0019978	hsa_circ_0019978
hsa_circ_0052077_CBC1	0.00380609	3.15	down	0.181457	-1.17902	-0.28634	-1.08771	-0.464477	1.01156	0.308519	0.702237	1.18429	2.23407	hsa_circ_0052077	hsa_circ_0052077
hsa_circ_0022166_CBC1	0.00329787	3.14914	down	0.0887416	0.698412	-1.17258	-0.218106	-0.443398	0.737884	1.18539	1.40099	2.29288	1.61072	hsa_circ_0022166	hsa_circ_0022166
hsa_circ_0058217_CBC1	0.00246495	3.14218	down	-0.855021	0.819964	-1.24134	-0.943006	-0.144794	1.08229	0.876909	1.2813	1.32985	1.32427	hsa_circ_0058217	hsa_circ_0058217
hsa_circ_0089521_CBC1	0.00291257	3.13317	down	0.466643	0.64985	0.41462	-1.08771	0.415914	1.45888	1.3195	1.59137	2.39902	2.32865	hsa_circ_0089521	hsa_circ_0089521
hsa_circ_0117363_CBC1	0.00531558	3.13288	down	-0.343498	0.105188	-0.31722	-1.08771	-1.38121	0.251866	0.251107	1.4208	1.35352	1.93572	hsa_circ_0117363	hsa_circ_0117363
hsa-circRNA13856_CBC1	0.00493825	3.1295	down	-1.47537	0.553399	-1.24134	-0.177047	0.098139	0.995157	0.617451	1.54519	1.31511	1.51453	hsa-circRNA13856
hsa-circRNA9251-1_CBC1	0.00585306	3.12842	down	-1.5239	0.803776	-1.20036	-0.443469	-0.409115	1.04567	1.1812	0.516421	1.66604	1.04478	hsa-circRNA9251-1
hsa_circ_0065646_CBC1	0.00918623	3.12814	down	5.2495	5.6826	5.72658	5.1765	6.68569	6.72772	6.42814	7.05885	8.5809	7.9518	hsa_circ_0065646	hsa_circ_0065646
hsa_circ_0048576_CBC1	0.00902717	3.11509	down	1.05805	1.79661	1.47984	1.279	2.16988	2.47763	1.93577	3.34563	4.0134	4.20731	hsa_circ_0048576	hsa_circ_0048576
hsa_circ_0022315_CBC1	0.00384061	3.10592	down	1.81665	1.73627	1.17295	1.50088	1.32731	2.05853	2.46367	3.28883	3.84666	4.07148	hsa_circ_0022315	hsa_circ_0022315
hsa_circ_0028560_CBC1	0.000181176	3.0992	down	-0.588079	-0.656201	-1.24134	-1.08771	-0.399612	1.40128	0.268632	0.80166	1.08114	0.633823	hsa_circ_0028560	hsa_circ_0028560
hsa_circ_0092107_CBC1	0.00297629	3.08901	down	0.754105	1.45824	0.25116	-0.344725	0.263329	1.27475	2.0169	2.03517	2.60182	2.58919	hsa_circ_0092107	hsa_circ_0092107
hsa_circ_0106831_CBC1	0.00978471	3.07811	down	-0.102682	1.85054	0.953401	0.467502	1.28975	1.43611	2.22008	2.55485	3.53162	2.82605	hsa_circ_0106831	hsa_circ_0106831
hsa_circ_0087579_CBC1	0.00339704	3.06789	down	-1.57208	0.674638	-0.628287	-0.0951465	-0.0718546	1.04962	1.12721	1.10312	1.75091	1.36262	hsa_circ_0087579	hsa_circ_0087579
hsa_circ_0086023_CBC1	0.000918706	3.05993	down	-1.13946	-0.429699	-0.778785	-1.08771	-0.367881	-0.166521	1.06404	1.28785	1.30114	0.777455	hsa_circ_0086023	hsa_circ_0086023
hsa-circRNA13474-10_CBC1	0.00643883	3.05626	down	0.838515	0.701012	0.0680333	0.464247	0.737848	1.12393	1.39729	2.175	3.34787	2.8244	hsa-circRNA13474-10
hsa_circ_0071973_CBC1	0.00591757	3.05596	down	-1.4096	0.415318	-1.24134	-0.794802	0.522395	0.786193	1.24967	1.12579	1.56776	0.820666	hsa_circ_0071973	hsa_circ_0071973
hsa-circRNA13049-2_CBC1	0.00702396	3.04974	down	-0.389248	-1.53274	-1.24134	-1.08771	-0.695074	0.722478	-0.813091	0.494644	1.50723	1.18604	hsa-circRNA13049-2
hsa_circ_0089767_CBC1	0.00633928	3.03555	down	0.179852	-0.182942	-1.04826	-1.08771	-0.44632	1.24428	-0.136657	1.46427	0.829293	2.02322	hsa_circ_0089767	hsa_circ_0089767
hsa_circ_0131700_CBC1	0.00493977	3.02414	down	1.08295	1.0286	-0.328314	-0.0379949	0.403869	1.21721	1.34981	2.51883	2.40529	2.6406	hsa_circ_0131700	hsa_circ_0131700
hsa_circ_0038495_CBC1	0.00758457	2.97221	down	-1.41016	-1.55576	-0.111759	0.113452	-0.443313	1.14357	1.62505	0.798656	0.993961	-0.111105	hsa_circ_0038495	hsa_circ_0038495
hsa_circ_0022620_CBC1	0.00472183	2.96229	down	-1.57208	0.454992	0.131027	-1.08771	-0.47054	0.83616	0.882426	1.12551	1.62797	0.817186	hsa_circ_0022620	hsa_circ_0022620
hsa-circRNA2396_CBC1	0.00174346	2.95518	down	-0.934005	0.272595	-1.2405	-1.08771	-0.182679	0.638878	1.5871	0.629725	0.948689	0.839545	hsa-circRNA2396
hsa_circ_0095776_CBC1	0.00580113	2.95007	down	0.0124296	1.019	0.421971	-1.07933	-0.481172	1.21305	1.15284	1.27969	1.80423	2.24683	hsa_circ_0095776	hsa_circ_0095776
hsa_circ_0031052_CBC1	0.00500299	2.93844	down	-0.316538	-0.251581	0.479122	-1.08771	-0.00464004	1.35845	0.328023	0.958384	2.08244	1.8666	hsa_circ_0031052	hsa_circ_0031052
hsa_circ_0121178_CBC1	0.002365	2.93353	down	0.321529	-1.04651	-0.224008	-1.08771	-0.685683	0.933154	0.139303	1.17943	1.3203	1.46863	hsa_circ_0121178	hsa_circ_0121178
hsa_circ_0063125_CBC1	0.000577503	2.92025	down	-0.42499	0.3521	-0.232517	-0.269602	-1.15247	1.34623	1.164	0.656584	1.35552	1.48067	hsa_circ_0063125	hsa_circ_0063125
hsa_circ_0121321_CBC1	0.000846089	2.90813	down	-0.585903	-0.0343301	-1.24134	-1.08771	-0.580883	0.177642	1.30463	0.562844	1.17723	0.947942	hsa_circ_0121321	hsa_circ_0121321
hsa-circRNA15774-3_CBC1	0.00232573	2.90733	down	-1.57208	0.183322	-1.06569	-1.08771	-0.254563	0.719209	0.409198	1.10447	1.15467	0.514187	hsa-circRNA15774-3
hsa_circ_0022279_CBC1	0.00289712	2.8973	down	-1.57208	-0.0419482	-0.484378	-0.94154	-0.478039	1.42884	0.349472	0.141727	1.29502	0.9405	hsa_circ_0022279	hsa_circ_0022279
hsa_circ_0044320_CBC1	0.0046526	2.89318	down	-1.30288	-1.05935	-1.24134	-1.08771	0.661703	0.408014	0.972708	0.482906	1.11909	0.650997	hsa_circ_0044320	hsa_circ_0044320
hsa_circ_0061948_CBC1	0.00139893	2.89177	down	0.146451	0.822223	-0.00905735	0.0275149	0.466126	1.21171	1.08886	2.08876	2.38519	2.33851	hsa_circ_0061948	hsa_circ_0061948
hsa_circ_0061990_CBC1	0.00914826	2.88469	down	-1.32848	-0.507903	0.0194268	-1.08771	0.226886	-0.112442	0.779752	1.1456	1.25055	1.90085	hsa_circ_0061990	hsa_circ_0061990
hsa_circ_0032731_CBC1	0.00619287	2.86645	down	-1.57208	0.0555145	-1.24134	-1.08771	-0.42145	-0.465191	0.746197	0.92727	1.10059	1.02038	hsa_circ_0032731	hsa_circ_0032731
hsa_circ_0110838_CBC1	0.00223244	2.86428	down	0.434744	-0.102317	-0.439947	-1.08771	-0.40377	0.284049	1.60524	1.52771	1.2241	1.35078	hsa_circ_0110838	hsa_circ_0110838
hsa_circ_0112003_CBC1	0.00929221	2.86372	down	-1.57208	0.780576	-1.24134	-1.08771	-0.469261	0.671262	1.31327	0.924938	0.319989	0.770176	hsa_circ_0112003	hsa_circ_0112003
hsa_circ_0109714_CBC1	0.00969756	2.85331	down	-0.0756886	1.10961	-1.24134	-1.08771	-0.461775	1.27975	0.861459	1.49998	1.41938	0.745719	hsa_circ_0109714	hsa_circ_0109714
hsa_circ_0091868_CBC1	0.00392082	2.82698	down	0.881314	0.904628	-0.612972	-0.296179	-0.524509	1.25711	1.87215	1.37645	2.02236	1.32052	hsa_circ_0091868	hsa_circ_0091868
hsa_circ_0011252_CBC1	0.00131706	2.82541	down	-0.222909	-0.0203883	-1.1458	-0.481539	-0.594429	0.50815	0.480287	0.897066	1.67997	1.46175	hsa_circ_0011252	hsa_circ_0011252
hsa-circRNA5056-22_CBC1	0.00614861	2.82038	down	-0.178522	0.160261	-1.22254	-1.08771	-0.459697	0.602156	0.0776904	0.792367	1.85728	1.36176	hsa-circRNA5056-22
hsa-circRNA16184-3_CBC1	0.00824576	2.81875	down	-1.34211	0.611869	-1.24134	-0.940849	-0.61684	0.966973	0.867123	1.2786	0.97907	-0.145762	hsa-circRNA16184-3
hsa_circ_0051763_CBC1	8.77675e-05	2.80383	down	-0.317701	-0.534778	0.245725	-0.257208	-0.485719	1.01717	0.974946	1.04859	1.25737	1.78924	hsa_circ_0051763	hsa_circ_0051763
hsa-circRNA2866-85_CBC1	0.00189234	2.79908	down	-0.092921	-0.994252	-1.24134	-1.08771	-0.368176	0.18018	0.139004	1.2021	1.22234	0.896746	hsa-circRNA2866-85
hsa-circRNA3898-9_CBC1	0.00233083	2.7982	down	-0.819732	0.513427	-1.24134	0.172757	-0.45762	0.998457	0.809242	1.14164	1.15414	1.48649	hsa-circRNA3898-9
hsa_circ_0110569_CBC1	0.00622392	2.78164	down	0.136101	0.609203	-1.24134	-1.08771	-0.303993	0.44324	0.91524	1.2422	1.43951	1.45175	hsa_circ_0110569	hsa_circ_0110569
hsa_circ_0076292_CBC1	0.00255771	2.7758	down	-0.838132	0.254651	-1.08952	-0.283555	0.322799	1.66733	1.26783	0.563708	0.89692	1.33499	hsa_circ_0076292	hsa_circ_0076292
hsa-circRNA11050-77_CBC1	0.00433245	2.77572	down	-1.56771	0.270619	-0.906423	-1.08771	-0.545971	0.230555	0.142276	0.988784	1.1412	1.02431	hsa-circRNA11050-77
hsa_circ_0004041_CBC1	0.00650241	2.7671	down	-0.5245	1.17274	0.74345	0.207291	-0.879157	1.43833	1.5548	1.48059	1.47306	2.11492	hsa_circ_0004041	hsa_circ_0004041
hsa_circ_0116218_CBC1	0.00432268	2.76656	down	-0.46605	0.47856	-0.580615	-1.08771	0.665203	1.19857	0.976089	0.923034	1.39706	1.85511	hsa_circ_0116218	hsa_circ_0116218
hsa-circRNA12642-10_CBC1	0.00346309	2.76592	down	0.504571	-0.0967614	-0.934256	-1.08771	-0.219082	0.444235	1.01022	1.26044	1.73869	1.05198	hsa-circRNA12642-10
hsa-circRNA11931-18_CBC1	0.00769721	2.76544	down	2.54142	2.66632	2.51128	1.74421	2.94398	2.91988	3.46388	3.84597	4.90235	4.61268	hsa-circRNA11931-18
hsa_circ_0022895_CBC1	0.00131582	2.75498	down	-0.0149229	0.257583	-1.24134	-1.08771	-0.346271	0.82518	0.858388	1.24761	0.986044	0.960329	hsa_circ_0022895	hsa_circ_0022895
hsa_circ_0049183_CBC1	0.00405118	2.74451	down	-0.392887	0.258055	0.557481	0.628245	0.289881	0.803912	2.02946	1.18112	2.06304	2.546	hsa_circ_0049183	hsa_circ_0049183
hsa_circ_0010311_CBC1	0.00131856	2.72808	down	0.483834	0.433721	-0.868897	-0.816176	-0.397553	0.988661	1.25696	1.35364	1.22481	1.25031	hsa_circ_0010311	hsa_circ_0010311
hsa-circRNA15948_CBC1	0.00908198	2.72653	down	-1.57208	0.315155	-0.970457	-1.08771	-0.519127	0.132289	0.149303	0.94186	1.6228	0.554842	hsa-circRNA15948
hsa_circ_0107854_CBC1	0.000814428	2.71907	down	0.0946532	-0.390801	-1.24134	-1.08771	-0.433211	0.826361	0.408909	1.06516	1.12967	0.727051	hsa_circ_0107854	hsa_circ_0107854
hsa_circ_0049893_CBC1	0.00266124	2.71809	down	-1.57208	-0.185789	-0.0544932	-1.08771	-0.401268	0.31813	0.748881	1.35538	0.597462	0.891765	hsa_circ_0049893	hsa_circ_0049893
hsa-circRNA11167_CBC1	0.000661729	2.7141	down	-1.16099	0.334445	-0.442094	-0.5695	-0.257071	0.934173	0.672912	1.31777	1.23182	0.950495	hsa-circRNA11167
hsa-circRNA11860-12_CBC1	0.00493991	2.70955	down	2.33056	2.97385	2.13774	1.74765	3.00664	3.0691	3.32893	4.2553	4.50603	4.22734	hsa-circRNA11860-12
hsa_circ_0086592_CBC1	0.000357532	2.70742	down	-0.712414	-0.861275	-0.914083	-1.08771	-0.460736	0.202795	0.865185	1.1665	0.889701	0.0242126	hsa_circ_0086592	hsa_circ_0086592
hsa_circ_0131197_CBC1	0.0049107	2.70146	down	-0.48481	0.303191	0.343574	-1.08771	0.391158	1.2207	0.539691	1.34979	1.60947	1.91446	hsa_circ_0131197	hsa_circ_0131197
hsa_circ_0135197_CBC1	0.00859558	2.70073	down	-1.57208	-0.822763	0.180287	-1.08771	-0.494978	-0.201998	1.14027	0.208475	1.36374	0.859026	hsa_circ_0135197	hsa_circ_0135197
hsa_circ_0096070_CBC1	0.00142068	2.69459	down	-0.655313	-0.946097	-1.24134	0.0455319	-0.646486	0.276295	0.180757	1.0106	1.11887	1.12011	hsa_circ_0096070	hsa_circ_0096070
hsa_circ_0107195_CBC1	0.00829999	2.69189	down	-1.57208	0.700011	-0.434832	-1.08771	-0.518473	0.609944	1.23516	0.394709	1.05388	0.936308	hsa_circ_0107195	hsa_circ_0107195
hsa-circRNA11209-2_CBC1	0.00531943	2.69112	down	-1.20913	-0.46437	-1.24134	-1.08771	-0.405397	-0.397924	1.1521	-0.07175	1.20155	0.849121	hsa-circRNA11209-2
hsa_circ_0062328_CBC1	0.00233543	2.67969	down	0.84863	-0.240683	-0.918496	-0.544255	-0.541569	0.913997	0.825775	1.45257	1.20508	1.31652	hsa_circ_0062328	hsa_circ_0062328
hsa_circ_0090607_CBC1	0.00267903	2.67672	down	0.32512	0.52583	-0.437142	-1.08771	-0.398981	1.35866	0.687347	1.12156	1.67025	1.19162	hsa_circ_0090607	hsa_circ_0090607
hsa_circ_0137781_CBC1	0.00302198	2.6695	down	-0.506882	-0.176515	-1.24134	-0.0744425	-0.425892	0.159973	1.6701	1.3456	0.571776	0.910329	hsa_circ_0137781	hsa_circ_0137781
hsa_circ_0087892_CBC1	0.0074159	2.64085	down	-1.07476	0.857101	-0.342207	-1.08771	-0.421098	0.610171	0.61017	1.04893	1.15957	1.5075	hsa_circ_0087892	hsa_circ_0087892
hsa-circRNA5415-2_CBC1	0.00736327	2.63132	down	-1.57208	0.199274	-1.24134	0.326639	-0.479232	0.83642	0.869435	1.19898	0.730535	0.576807	hsa-circRNA5415-2
hsa_circ_0123563_CBC1	0.000574087	2.62347	down	-0.0179601	-0.374037	-1.24134	-1.08771	-0.386477	0.445979	1.06398	0.831872	0.719884	0.788145	hsa_circ_0123563	hsa_circ_0123563
hsa_circ_0032124_CBC1	0.00863089	2.62039	down	0.437047	1.32722	0.214468	-0.159768	0.726935	1.25787	1.31789	1.61071	2.7156	2.59274	hsa_circ_0032124	hsa_circ_0032124
hsa_circ_0060199_CBC1	0.00257871	2.61939	down	-0.0194025	0.179833	-1.24134	-0.870393	-0.543231	0.871365	1.03827	0.510659	1.51454	0.516785	hsa_circ_0060199	hsa_circ_0060199
hsa_circ_0047757_CBC1	0.00370133	2.60912	down	0.788746	0.227385	-0.756008	-0.405228	-0.412543	1.7645	0.96986	1.71442	1.16862	0.742762	hsa_circ_0047757	hsa_circ_0047757
hsa_circ_0050311_CBC1	0.00120427	2.60135	down	0.740872	-0.474088	-0.410446	-0.0830148	0.465711	1.18415	1.71381	1.45146	1.01183	1.7741	hsa_circ_0050311	hsa_circ_0050311
hsa_circ_0024546_CBC1	0.00337057	2.5757	down	0.552665	-0.50724	-1.24134	-0.248361	0.150046	1.0507	1.43274	1.04844	0.673339	1.32538	hsa_circ_0024546	hsa_circ_0024546
hsa-circRNA1410-13_CBC1	0.00889429	2.57175	down	0.0974067	-0.920231	-1.24134	-1.08771	-0.458942	0.860112	0.963725	1.32751	-0.514918	0.566496	hsa-circRNA1410-13
hsa_circ_0026172_CBC1	0.0080468	2.56916	down	1.97043	1.71654	1.20726	0.436979	1.5508	2.10911	2.16395	2.62331	3.45268	3.33945	hsa_circ_0026172	hsa_circ_0026172
hsa_circ_0046585_CBC1	0.00857501	2.56829	down	0.00334859	1.54414	-0.50353	0.668881	0.988958	1.51391	1.60642	1.95477	2.3798	2.05093	hsa_circ_0046585	hsa_circ_0046585
hsa_circ_0081924_CBC1	0.00146307	2.56824	down	-0.801128	-0.336078	-0.791396	-1.08771	-0.435824	0.782188	0.915049	1.11958	0.849944	-0.314995	hsa_circ_0081924	hsa_circ_0081924
hsa_circ_0050960_CBC1	0.00997191	2.55598	down	-1.55106	-0.49549	-1.24134	-1.08771	-0.452379	0.602827	-0.208003	1.00811	-0.602615	1.14108	hsa_circ_0050960	hsa_circ_0050960
hsa_circ_0118125_CBC1	0.00336981	2.54542	down	-0.117551	0.337552	-1.24134	0.0354345	-0.00618309	0.821097	1.07673	1.07598	1.85698	0.916629	hsa_circ_0118125	hsa_circ_0118125
hsa-circRNA14611-4_CBC1	0.00886812	2.54541	down	0.933401	0.987168	-0.111756	-0.542639	-0.356955	1.6784	0.678846	1.93976	1.72586	1.62584	hsa-circRNA14611-4
hsa_circ_0001642_CBC1	0.00985958	2.5411	down	-1.57208	0.574721	-0.0527832	-1.08353	-0.424221	0.891885	0.613451	0.461271	1.01868	1.18409	hsa_circ_0001642	hsa_circ_0001642
hsa_circ_0080373_CBC1	0.00837383	2.54055	down	-0.918413	0.463957	-0.106164	-1.08771	-0.423887	0.874241	0.272764	0.437099	1.4557	1.61369	hsa_circ_0080373	hsa_circ_0080373
hsa_circ_0065052_CBC1	0.00899289	2.53249	down	-0.208858	-0.024307	-1.24134	-0.73315	0.897267	0.869785	0.635008	1.53185	1.10614	1.24961	hsa_circ_0065052	hsa_circ_0065052
hsa_circ_0041122_CBC1	0.00212315	2.53141	down	0.140135	-0.301374	-1.24134	-1.08771	-0.383381	0.918945	0.152971	0.897741	0.858686	0.997698	hsa_circ_0041122	hsa_circ_0041122
hsa_circ_0029586_CBC1	0.00732682	2.52124	down	-0.688509	0.764894	0.396676	-1.08771	-0.368745	1.12941	1.33884	0.603265	1.49736	1.11838	hsa_circ_0029586	hsa_circ_0029586
hsa_circ_0044560_CBC1	0.00910537	2.51709	down	-0.593883	-0.299359	-0.821496	0.0503144	1.14306	0.905334	0.762543	1.433	1.77494	1.2616	hsa_circ_0044560	hsa_circ_0044560
hsa_circ_0020569_CBC1	0.00953537	2.51617	down	-0.5202	0.47001	-0.381878	-1.08771	-0.319597	0.255811	1.5701	0.500602	1.79336	0.69691	hsa_circ_0020569	hsa_circ_0020569
hsa_circ_0078409_CBC1	0.00749984	2.50523	down	0.196169	0.0349254	-0.234046	-1.03206	-0.720186	0.914824	1.50441	0.190856	1.75251	0.506923	hsa_circ_0078409	hsa_circ_0078409
hsa_circ_0055695_CBC1	0.00395944	2.50238	down	0.748089	0.950604	0.705086	-0.251493	-0.253122	1.32111	1.29492	1.67569	2.4093	1.81465	hsa_circ_0055695	hsa_circ_0055695
hsa_circ_0041959_CBC1	0.00574069	2.49405	down	-1.57208	0.392065	-0.848845	-0.744864	-0.436949	0.807427	1.16788	0.439446	0.293312	0.673709	hsa_circ_0041959	hsa_circ_0041959
hsa_circ_0135632_CBC1	0.00534236	2.49284	down	-0.499259	0.558823	-0.578242	-1.08771	-0.442096	0.139872	1.23326	0.91063	0.816164	1.44055	hsa_circ_0135632	hsa_circ_0135632
hsa_circ_0130557_CBC1	0.00395414	2.48076	down	-1.20297	0.328561	-1.24134	-1.08771	-0.439318	0.843671	0.415684	0.741192	0.157986	0.752585	hsa_circ_0130557	hsa_circ_0130557
hsa_circ_0131819_CBC1	0.005245	2.47173	down	0.669101	-0.300468	-1.24134	-1.08771	-0.42456	0.879034	0.796972	0.925253	0.908153	0.633219	hsa_circ_0131819	hsa_circ_0131819
hsa_circ_0029513_CBC1	0.00255318	2.47072	down	-0.690615	0.423327	-0.979002	-1.08771	-0.500249	0.581298	0.68239	1.26522	0.457857	0.703632	hsa_circ_0029513	hsa_circ_0029513
hsa-circRNA462-15_CBC1	0.00622532	2.46953	down	-1.57208	-0.198324	-1.24134	-0.997081	-1.08334	-0.685402	0.170509	0.846674	0.361013	0.736199	hsa-circRNA462-15
hsa-circRNA6981-4_CBC1	0.0088107	2.46231	down	0.781386	2.11537	1.50773	1.91987	2.4035	2.43916	2.68978	2.85931	3.81967	3.42001	hsa-circRNA6981-4
hsa_circ_0015901_CBC1	0.00273072	2.46162	down	-0.891663	0.291006	-1.09623	-0.347246	-0.458462	0.77474	0.20974	1.18304	1.20794	0.619995	hsa_circ_0015901	hsa_circ_0015901
hsa-circRNA4710-24_CBC1	0.00469886	2.46153	down	-0.0342478	-0.443701	-1.24134	-1.08771	-0.485457	0.230543	-0.0293598	1.09388	1.29999	0.610272	hsa-circRNA4710-24
hsa_circ_0013847_CBC1	0.00964315	2.45325	down	1.05709	0.94992	-0.305283	-0.0400023	0.320367	1.24961	0.893001	1.81595	2.37948	2.11753	hsa_circ_0013847	hsa_circ_0013847
hsa_circ_0027201_CBC1	0.00790497	2.42755	down	0.608867	0.0580663	-1.24134	-1.04344	-0.554262	1.2138	0.584981	0.968094	0.592666	0.865836	hsa_circ_0027201	hsa_circ_0027201
hsa_circ_0063635_CBC1	0.00180694	2.41833	down	0.169722	-0.632614	-1.24134	-0.580052	-0.292413	0.795856	1.18131	0.773993	0.21141	0.83079	hsa_circ_0063635	hsa_circ_0063635
hsa_circ_0026086_CBC1	0.00273634	2.4124	down	0.061141	0.656065	-0.844025	-0.706575	-0.206503	1.16538	1.38746	1.03889	0.633826	1.08689	hsa_circ_0026086	hsa_circ_0026086
hsa-circRNA11746-21_CBC1	0.00204103	2.40229	down	-0.0685694	0.132013	0.221643	0.811034	0.612643	0.969077	1.78794	1.1467	2.07833	2.04877	hsa-circRNA11746-21
hsa_circ_0108540_CBC1	0.0052607	2.39816	down	0.0966349	-1.46696	-0.820949	-1.08771	-0.410481	0.41986	-0.189792	0.779049	0.827965	0.783104	hsa_circ_0108540	hsa_circ_0108540
hsa-circRNA7461-8_CBC1	0.00304745	2.39759	down	-0.254032	-0.420802	0.236795	-1.08085	-0.450854	0.293882	1.00006	1.29251	1.32003	0.431688	hsa-circRNA7461-8
hsa-circRNA4611-9_CBC1	0.000906191	2.39539	down	-0.675011	0.0911851	-0.710573	-1.00483	0.0837135	1.06277	0.897275	0.469417	0.927065	0.729276	hsa-circRNA4611-9
hsa-circRNA13408-9_CBC1	0.00780276	2.39437	down	0.167812	0.795979	0.347401	-1.08771	0.735066	1.30195	1.1613	1.39497	1.72215	1.67642	hsa-circRNA13408-9
hsa-circRNA2798-30_CBC1	0.00544492	2.39266	down	0.5461	0.0931721	-0.731156	-1.08771	-0.424471	1.14402	0.367385	1.12623	1.2675	0.783877	hsa-circRNA2798-30
hsa_circ_0061047_CBC1	0.00898332	2.38322	down	1.27103	0.0733545	-0.0462296	-0.331504	-0.511804	1.24079	1.19617	1.26118	0.952258	2.06901	hsa_circ_0061047	hsa_circ_0061047
hsa_circ_0012681_CBC1	0.00811887	2.37998	down	1.05006	0.712233	-0.355352	-0.388098	-0.118314	1.84783	0.664576	1.56483	1.44206	1.63599	hsa_circ_0012681	hsa_circ_0012681
hsa_circ_0092227_CBC1	0.000459772	2.36137	down	-0.333103	0.391532	-0.867133	-0.255876	-0.484995	1.21248	0.848786	0.945404	0.787081	0.854802	hsa_circ_0092227	hsa_circ_0092227
hsa_circ_0018701_CBC1	0.00754896	2.3516	down	-1.57208	-0.470313	0.40573	-1.08771	-0.453462	0.540948	0.884481	0.57007	0.706611	0.288272	hsa_circ_0018701	hsa_circ_0018701
hsa_circ_0102658_CBC1	0.00220799	2.34412	down	-0.474541	-0.0931237	-0.186597	-1.08771	-0.497668	0.748182	0.749782	0.074231	1.44255	0.790839	hsa_circ_0102658	hsa_circ_0102658
hsa_circ_0079271_CBC1	0.0072868	2.34251	down	1.71854	1.18814	1.1442	0.564803	1.45688	3.33196	1.76571	1.93062	2.7782	2.40632	hsa_circ_0079271	hsa_circ_0079271
hsa_circ_0066370_CBC1	0.00493904	2.3388	down	0.0122015	0.655645	-1.09259	-0.148924	-0.506731	1.23732	0.48007	1.10943	1.15925	1.06238	hsa_circ_0066370	hsa_circ_0066370
hsa-circRNA14672-2_CBC1	0.00189124	2.33681	down	0.879946	1.10236	0.473401	-0.0100409	0.912757	1.63201	1.35866	1.98083	2.39413	2.11548	hsa-circRNA14672-2
hsa_circ_0048279_CBC1	0.00318605	2.32962	down	-1.28752	-0.629956	-1.24134	-0.497031	-0.633906	0.686384	-0.221714	-0.191772	0.964668	0.573161	hsa_circ_0048279	hsa_circ_0048279
hsa-circRNA11082_CBC1	0.0032956	2.32929	down	-0.660187	-0.126467	-0.452199	-1.08771	-0.514375	0.745415	-0.312719	1.146	0.855415	0.824422	hsa-circRNA11082
hsa_circ_0051562_CBC1	0.00853995	2.32876	down	1.29898	1.56263	0.778592	0.257702	1.08606	1.90028	1.32546	2.7195	2.3761	2.76042	hsa_circ_0051562	hsa_circ_0051562
hsa_circ_0009710_CBC1	0.00405624	2.3257	down	0.375999	0.09236	-0.745322	0.00865585	0.354759	0.638215	0.995692	1.10775	1.44462	1.9885	hsa_circ_0009710	hsa_circ_0009710
hsa_circ_0109019_CBC1	0.0035989	2.32447	down	0.0230453	0.0658635	0.161668	-0.0144016	-0.379706	1.15164	1.14282	2.19143	1.03178	0.423303	hsa_circ_0109019	hsa_circ_0109019
hsa_circ_0045997_CBC1	0.00221954	2.32244	down	1.56629	1.6297	0.697245	1.39157	1.92288	2.35911	2.49622	2.4915	3.37867	2.56041	hsa_circ_0045997	hsa_circ_0045997
hsa_circ_0009591_CBC1	0.00428546	2.31575	down	-0.368956	1.22235	-0.0720613	0.470573	0.84266	1.40669	1.76925	1.89385	1.6911	1.39106	hsa_circ_0009591	hsa_circ_0009591
hsa_circ_0023838_CBC1	0.00472474	2.3127	down	0.347387	0.282024	-0.0262337	-0.306618	-0.605908	0.959683	0.238502	1.4166	1.68636	1.4374	hsa_circ_0023838	hsa_circ_0023838
hsa_circ_0045754_CBC1	0.000584862	2.31196	down	-0.0849249	0.522917	-0.648965	0.0437483	0.145348	1.24544	0.911848	1.49743	0.992606	1.37638	hsa_circ_0045754	hsa_circ_0045754
hsa-circRNA10151-128_CBC1	0.00593386	2.30982	down	1.00991	0.846843	1.04654	0.150262	1.44594	1.28574	2.55798	1.85468	2.62324	2.21674	hsa-circRNA10151-128
hsa_circ_0022736_CBC1	0.00988345	2.30632	down	-0.843641	0.563417	-0.203685	-1.08771	0.23816	0.443018	0.80594	0.822807	1.4852	1.13754	hsa_circ_0022736	hsa_circ_0022736
hsa_circ_0037659_CBC1	0.000133898	2.3055	down	0.131236	0.901284	0.292646	0.177192	0.221641	1.70231	1.18218	1.75555	1.65681	1.45255	hsa_circ_0037659	hsa_circ_0037659
hsa_circ_0013550_CBC1	0.00842343	2.30148	down	0.525149	0.524535	-0.930179	-0.426442	-0.228029	1.40911	1.42479	0.74862	0.480582	1.41473	hsa_circ_0013550	hsa_circ_0013550
hsa-circRNA13600-2_CBC1	0.000498915	2.28572	down	-0.883483	-0.648802	0.0303835	-0.612291	-0.336521	0.802669	0.258142	0.573155	0.745345	1.13323	hsa-circRNA13600-2
hsa-circRNA10372-12_CBC1	0.00760049	2.28152	down	0.615026	-0.529324	-0.398713	-1.08771	-0.0445998	0.715605	1.28545	0.895743	1.28975	0.318112	hsa-circRNA10372-12
hsa_circ_0081635_CBC1	0.000984287	2.27537	down	-0.446894	-0.0202615	-0.529533	-0.269202	0.384714	1.09712	0.447455	1.26877	1.38397	0.852026	hsa_circ_0081635	hsa_circ_0081635
hsa-circRNA12048-1_CBC1	0.00698832	2.26284	down	2.11222	2.81492	1.91638	1.84056	2.48406	3.21185	2.49693	3.47594	4.07731	3.79679	hsa-circRNA12048-1
hsa_circ_0003557_CBC1	0.00704271	2.25938	down	0.433545	0.644585	-0.326102	-0.263288	-0.794227	0.518725	1.01553	0.987417	1.40415	1.64833	hsa_circ_0003557	hsa_circ_0003557
hsa-circRNA10994_CBC1	0.00227168	2.25766	down	1.04732	2.22359	1.06494	1.40011	1.58925	2.45303	2.20186	2.54928	3.03032	2.96488	hsa-circRNA10994
hsa_circ_0079041_CBC1	0.00560863	2.25169	down	0.755715	0.418677	-0.604193	-0.741425	-0.416995	1.10368	0.701843	1.2853	1.09487	1.08114	hsa_circ_0079041	hsa_circ_0079041
hsa_circ_0039911_CBC1	0.00337542	2.2492	down	-0.447338	0.00576983	-1.24134	-0.626378	-0.701006	-0.0886898	0.326936	0.753792	0.801769	1.04296	hsa_circ_0039911	hsa_circ_0039911
hsa-circRNA2070-2_CBC1	0.00641388	2.24864	down	0.377409	0.066409	-1.24134	-0.41804	-0.281991	0.553524	1.18615	0.653956	0.603674	1.35041	hsa-circRNA2070-2
hsa_circ_0081549_CBC1	0.00362241	2.24747	down	0.25106	-0.627747	0.240027	-0.843942	-0.22663	0.705795	1.41616	1.27696	0.436773	0.798591	hsa_circ_0081549	hsa_circ_0081549
hsa_circ_0111747_CBC1	0.00764286	2.24714	down	-0.17859	0.260942	-0.481252	-1.08771	0.245254	0.758992	0.813673	0.497363	1.74423	0.784836	hsa_circ_0111747	hsa_circ_0111747
hsa-circRNA8598-24_CBC1	0.000350504	2.24085	down	0.456055	0.424775	0.0926268	-0.184936	-0.466924	1.52072	1.27139	1.14396	1.01154	1.1942	hsa-circRNA8598-24
hsa-circRNA11367-3_CBC1	0.000712038	2.2399	down	0.493555	0.0871827	-0.0952337	-0.606685	-0.451755	1.22334	1.23787	1.10066	0.708782	0.973592	hsa-circRNA11367-3
hsa_circ_0028410_CBC1	0.00920246	2.23855	down	-0.566478	0.490791	-1.24134	-1.08771	-0.589949	0.682478	0.362553	1.05963	0.137476	0.575984	hsa_circ_0028410	hsa_circ_0028410
hsa_circ_0080718_CBC1	0.000141247	2.23488	down	0.237055	0.494548	-0.125113	-0.434809	-0.0516954	0.949821	1.30572	1.18769	1.2907	1.18705	hsa_circ_0080718	hsa_circ_0080718
hsa_circ_0023087_CBC1	0.0010519	2.23433	down	-0.0638989	0.772208	-0.239457	-0.513749	-0.0172456	0.980082	1.00462	1.17162	1.47042	1.11032	hsa_circ_0023087	hsa_circ_0023087
hsa-circRNA5223-14_CBC1	0.00207811	2.22655	down	-0.18103	-0.413931	-0.737532	-0.908488	-0.604094	0.696358	0.349102	0.982204	-0.162693	1.06399	hsa-circRNA5223-14
hsa_circ_0074871_CBC1	0.00548163	2.22599	down	0.400769	-0.260545	-0.603295	-1.08771	-0.433085	0.0247981	0.800869	0.992739	1.02903	0.940927	hsa_circ_0074871	hsa_circ_0074871
hsa_circ_0010770_CBC1	0.000628365	2.21562	down	0.5302	0.598886	-0.27288	0.277541	0.412718	1.20506	1.04398	1.8223	1.60999	1.60368	hsa_circ_0010770	hsa_circ_0010770
hsa_circ_0049664_CBC1	0.0080659	2.21371	down	0.219637	-0.425961	-0.280287	-1.08771	-0.415103	-0.00122895	0.467949	1.06765	1.4762	0.732342	hsa_circ_0049664	hsa_circ_0049664
hsa_circ_0064267_CBC1	0.00720859	2.21001	down	2.16203	2.29554	2.17611	0.935524	1.22257	3.02002	2.66043	2.78693	2.61	3.43468	hsa_circ_0064267	hsa_circ_0064267
hsa-circRNA1309-3_CBC1	0.00674414	2.20879	down	0.0918159	0.420604	0.111827	0.647714	1.19609	0.850901	1.43347	1.63791	2.21238	2.04965	hsa-circRNA1309-3
hsa-circRNA11435-16_CBC1	0.00747245	2.19812	down	0.137107	0.572479	-1.12185	-0.587492	-0.409121	0.657878	1.28311	1.01388	0.65205	0.665556	hsa-circRNA11435-16
hsa_circ_0038870_CBC1	0.00918101	2.19521	down	0.37067	0.0793422	-0.385392	-1.08771	0.310859	0.938459	1.55024	0.440366	0.771521	1.25899	hsa_circ_0038870	hsa_circ_0038870
hsa-circRNA13990-29_CBC1	0.00671625	2.18477	down	0.526398	-0.515895	0.474055	0.412385	-0.39758	0.947722	1.81105	1.26277	1.50975	0.605464	hsa-circRNA13990-29
hsa_circ_0035071_CBC1	0.00366977	2.18149	down	-0.0585006	0.549014	-0.215208	-1.01384	0.0207004	1.34323	1.05956	1.02872	0.673983	0.803237	hsa_circ_0035071	hsa_circ_0035071
hsa_circ_0071383_CBC1	0.00260699	2.17877	down	-0.0545327	0.906696	-0.0608114	-0.414657	-0.0489751	1.17369	0.810893	1.09472	1.1974	1.66859	hsa_circ_0071383	hsa_circ_0071383
hsa_circ_0105100_CBC1	0.00708569	2.17262	down	1.64121	2.00471	1.2175	1.08252	2.153	2.32478	2.19396	2.79239	3.49127	2.89373	hsa_circ_0105100	hsa_circ_0105100
hsa-circRNA5108_CBC1	0.0033369	2.16307	down	1.15828	1.60237	0.763092	0.334813	1.12277	1.80997	1.86257	1.90973	2.69284	2.27162	hsa-circRNA5108
hsa_circ_0009364_CBC1	0.00858829	2.15701	down	0.297133	0.169582	-1.24134	-0.673319	-0.456823	0.680831	0.409222	0.534946	1.2947	0.720692	hsa_circ_0009364	hsa_circ_0009364
hsa_circ_0076050_CBC1	0.00467216	2.15002	down	0.339952	-0.959851	-0.712623	-0.0685683	-0.422341	0.713389	1.26687	0.401163	0.932942	0.383956	hsa_circ_0076050	hsa_circ_0076050
hsa_circ_0101177_CBC1	0.0037734	2.14594	down	-0.358034	-0.460212	0.205431	0.0102967	-0.260581	0.404427	1.62554	1.187	1.08263	0.34535	hsa_circ_0101177	hsa_circ_0101177
hsa_circ_0113731_CBC1	0.00188118	2.13271	down	-0.0877423	0.0624363	0.310982	-0.185559	0.186058	0.676056	1.2444	0.591625	1.68611	1.55144	hsa_circ_0113731	hsa_circ_0113731
hsa_circ_0069005_CBC1	0.00645385	2.13236	down	-0.139665	0.315035	-1.24134	-0.662776	0.118144	0.720779	0.68924	0.881967	1.07277	0.486911	hsa_circ_0069005	hsa_circ_0069005
hsa_circ_0004381_CBC1	0.0092541	2.13009	down	0.63751	1.48697	0.441735	0.12676	1.47993	1.35889	2.16034	1.77886	2.13939	2.18999	hsa_circ_0004381	hsa_circ_0004381
hsa_circ_0138065_CBC1	0.00795108	2.1286	down	0.92857	0.283333	-0.248769	-0.678978	0.115247	0.652941	1.14165	1.58928	1.11247	1.35258	hsa_circ_0138065	hsa_circ_0138065
hsa_circ_0049629_CBC1	0.00839764	2.12259	down	1.35906	1.0475	-0.278168	0.881132	0.500257	1.52738	1.78327	1.67525	1.64644	2.30658	hsa_circ_0049629	hsa_circ_0049629
hsa_circ_0021676_CBC1	0.00348919	2.12002	down	-0.174973	0.849308	-0.392648	0.246297	-0.503914	1.13703	1.08213	1.41648	0.964668	0.84414	hsa_circ_0021676	hsa_circ_0021676
hsa_circ_0133691_CBC1	0.00549009	2.11667	down	0.30199	0.416631	-1.10644	-0.32195	-0.533594	0.743986	0.94787	0.799515	1.00898	0.665264	hsa_circ_0133691	hsa_circ_0133691
hsa-circRNA3652-3_CBC1	0.000137829	2.10604	down	0.110206	0.0780517	-0.279168	-0.321297	0.108616	0.84502	0.77555	1.2161	0.833807	1.3986	hsa-circRNA3652-3
hsa-circRNA5417-5_CBC1	0.00278602	2.10513	down	0.790766	0.0779763	0.452119	0.439782	-0.459958	1.11183	0.990975	1.48364	1.32208	1.76171	hsa-circRNA5417-5
hsa_circ_0112115_CBC1	0.00572667	2.09997	down	-0.115108	1.01331	-0.506488	0.21575	-0.410841	1.21302	1.163	0.810788	1.07296	1.28871	hsa_circ_0112115	hsa_circ_0112115
hsa_circ_0040975_CBC1	0.00420704	2.09901	down	-0.0931658	0.191203	-1.21093	-0.696393	-0.156685	0.736947	0.330546	0.682486	0.97848	0.654119	hsa_circ_0040975	hsa_circ_0040975
hsa_circ_0107515_CBC1	0.00691088	2.09487	down	0.223866	0.33663	0.211551	-1.08771	0.476154	0.944863	0.871699	1.13564	1.25439	1.28821	hsa_circ_0107515	hsa_circ_0107515
hsa_circ_0100854_CBC1	0.00685977	2.09338	down	0.160861	0.043039	-0.0933277	-1.08771	-0.376895	0.599255	1.42467	0.781456	0.250914	0.918838	hsa_circ_0100854	hsa_circ_0100854
hsa_circ_0090668_CBC1	0.00880151	2.08898	down	-0.0642855	0.506161	-1.24134	-0.626577	-0.368399	0.708537	0.455828	0.644841	1.0905	0.619861	hsa_circ_0090668	hsa_circ_0090668
hsa_circ_0069754_CBC1	0.00715624	2.07965	down	0.195536	-0.216399	-0.521403	-0.888794	-0.296728	1.06342	-0.10552	0.747421	0.594739	1.25384	hsa_circ_0069754	hsa_circ_0069754
hsa_circ_0097041_CBC1	0.000515856	2.07521	down	-0.261504	0.655341	0.400203	0.305226	0.634003	1.29183	1.30173	1.28061	1.74846	1.37693	hsa_circ_0097041	hsa_circ_0097041
hsa_circ_0052702_CBC1	0.00708262	2.07425	down	1.08491	0.519428	-0.236546	0.550393	1.14112	1.41069	1.29918	1.55556	1.96308	2.09375	hsa_circ_0052702	hsa_circ_0052702
hsa_circ_0033554_CBC1	0.000480017	2.0732	down	0.337122	0.929281	0.194634	0.101991	0.614603	1.70201	1.14845	1.33261	1.54357	1.71029	hsa_circ_0033554	hsa_circ_0033554
hsa_circ_0024961_CBC1	0.00641521	2.06972	down	-0.346733	0.28493	0.235056	-1.08771	-0.389011	0.6807	0.66037	1.12144	1.09476	0.386423	hsa_circ_0024961	hsa_circ_0024961
hsa_circ_0062743_CBC1	0.00624508	2.06713	down	0.0629948	0.123158	-0.837825	-1.08771	-0.404504	0.490946	0.398038	1.13425	0.280355	0.790694	hsa_circ_0062743	hsa_circ_0062743
hsa_circ_0056278_CBC1	0.00807397	2.06304	down	0.489049	1.16772	-0.441836	-0.118724	0.263473	1.32865	1.75081	1.22461	1.21139	1.0681	hsa_circ_0056278	hsa_circ_0056278
hsa_circ_0042265_CBC1	0.00558787	2.06014	down	0.336131	1.45735	0.408913	0.863708	1.29045	1.82598	1.39452	1.8319	2.23714	2.28074	hsa_circ_0042265	hsa_circ_0042265
hsa_circ_0022890_CBC1	0.0071781	2.05917	down	1.09922	1.1124	1.20696	-0.0694894	0.961318	1.34541	2.1183	1.67496	2.22932	2.15273	hsa_circ_0022890	hsa_circ_0022890
hsa-circRNA13520-15_CBC1	0.00173785	2.04733	down	0.405805	1.14534	0.163476	0.300251	0.658297	1.50668	1.21836	1.43553	2.08239	1.59891	hsa-circRNA13520-15
hsa_circ_0115908_CBC1	0.00291213	2.04205	down	0.668467	0.243901	0.402264	-0.230298	-0.433803	1.43121	1.53485	0.972419	1.00909	0.853054	hsa_circ_0115908	hsa_circ_0115908
hsa_circ_0124879_CBC1	0.00582203	2.04175	down	-0.661566	0.71773	0.651068	0.1306	0.18083	1.05511	1.59242	1.24724	1.39069	0.882228	hsa_circ_0124879	hsa_circ_0124879
hsa-circRNA7866-18_CBC1	0.00627844	2.04148	down	-0.0750847	0.992464	0.28901	-0.330627	-0.0910697	0.818532	1.41966	1.28352	1.59458	0.81648	hsa-circRNA7866-18
hsa_circ_0010705_CBC1	0.00723978	2.04074	down	-0.180815	0.0970679	-1.24134	0.393621	-0.403878	0.679619	0.557149	0.814369	1.00905	0.749913	hsa_circ_0010705	hsa_circ_0010705
hsa_circ_0034230_CBC1	0.00625242	2.03575	down	1.0153	0.760204	0.492005	-0.133113	0.870728	1.47008	1.24672	1.25286	2.16313	2.00012	hsa_circ_0034230	hsa_circ_0034230
hsa_circ_0065955_CBC1	0.00893259	2.03415	down	0.559989	0.00944827	-0.529834	-1.08771	-0.379005	0.707335	0.410431	1.10589	0.847179	0.624187	hsa_circ_0065955	hsa_circ_0065955
hsa_circ_0032563_CBC1	0.0045805	2.02728	down	0.999517	1.36501	0.356134	0.143404	0.621833	1.39972	1.87141	2.09329	1.84991	1.36928	hsa_circ_0032563	hsa_circ_0032563
hsa_circ_0027635_CBC1	0.00801758	2.0266	down	-0.515768	0.00494492	-1.24134	-0.164442	-0.393472	0.432844	0.81636	1.05108	-0.10699	0.591926	hsa_circ_0027635	hsa_circ_0027635
hsa_circ_0102488_CBC1	0.00149768	2.02424	down	1.10209	0.551101	0.672247	-0.0255925	0.398841	1.59265	1.83833	1.57787	1.63044	1.1463	hsa_circ_0102488	hsa_circ_0102488
hsa_circ_0027765_CBC1	0.00562304	2.02154	down	0.95403	-0.47314	0.319926	-0.228697	0.371263	0.941087	1.49728	1.39609	1.06828	1.1179	hsa_circ_0027765	hsa_circ_0027765
hsa_circ_0078705_CBC1	0.00877101	2.01309	down	0.408582	-1.26803	-0.0818203	-0.156374	-0.0186039	0.971295	0.708759	0.489256	0.795452	0.966041	hsa_circ_0078705	hsa_circ_0078705
hsa_circ_0022765_CBC1	0.000849809	2.00651	down	0.301401	0.689046	0.146133	-0.328455	0.607195	1.18881	1.24143	1.27462	1.54967	1.18421	hsa_circ_0022765	hsa_circ_0022765
hsa_circ_0090830_CBC1	0.00414515	2.00569	down	-0.620527	-0.235884	-0.0422242	-1.08771	0.144772	0.552984	0.353349	1.01239	0.836878	0.423312	hsa_circ_0090830	hsa_circ_0090830
hsa-circRNA11563-13_CBC1	0.00620357	2.00426	down	0.270499	0.156816	-0.68023	0.716921	-0.400807	1.39556	1.12804	0.84144	0.778003	0.93549	hsa-circRNA11563-13
hsa_circ_0082799_CBC1	0.000345255	2.00395	down	0.3952	0.405927	0.545843	-0.173225	-0.088086	1.39002	1.13351	1.15271	1.44398	0.979668	hsa_circ_0082799	hsa_circ_0082799
hsa-circRNA11370-23_CBC1	0.00511642	2.00251	down	0.816601	0.81394	0.462866	0.0681328	0.579116	1.31921	0.822128	1.62181	1.90493	2.08165	hsa-circRNA11370-23
