# Supplementary material for: Circ-GALNT16 restrains colorectal cancer progression by enhancing the SUMOylation of hnRNPK
Source: J Exp Clin Cancer Res. 2021 Aug 27;40:272. doi: 10.1186/s13046-021-02074-7 (PMC8400830; doi:10.1186/s13046-021-02074-7)
Supplement: Supplementary file 12 — Additional file 12: Table S2. The expression of circ-GALNT16 in 100 pairs of CRC tissues and relative expression in different pathological groups. [file 13046_2021_2074_MOESM12_ESM.xlsx]

## Sheet: expression
Table S2a:The expression of circ-GALNT16 in 100 pairs of CRC tissues
patient	Normal			Tumor
1	-16.4745	-16.7254	-16.2607	-16.5023	-18.3065	-16.9107
2	-9.24272	-8.70845	-8.67763	-11.3212	-10.159	-10.9096
3	-4.70849	-4.92387	-4.1087	-4.77308	-6.5287	-6.61034
4	-12.9314	-11.3692	-12.1531	-13.9872	-14.2893	-13.802
5	-9.2937	-8.58013	-9.18996	-13.6522	-13.8985	-12.292
6	-10.3516	-9.71319	-10.3697	-13.6417	-13.4556	-13.3836
7	-8.97575	-7.81078	-8.78349	-11.6755	-13.8667	-10.3397
8	-9.40825	-9.25765	-9.48368	-10.9728	-10.4677	-10.5834
9	-7.04178	-7.48775	-7.48979	-8.52956	-8.62729	-8.92123
10	-13.8449	-13.9117	-14.4535	-14.1212	-15.7704	-14.1553
11	-10.8932	-11.1298	-10.9036	-8.95131	-9.02682	-8.91164
12	-8.65209	-8.69449	-8.73907	-9.47471	-9.56772	-9.52736
13	-11.7875	-11.0974	-11.3865	-13.0415	-12.3113	-12.706
14	-9.75098	-9.10704	-8.98417	-13.3484	-13.1788	-13.2149
15	-9.56159	-9.86532	-8.51896	-12.9442	-13.0592	-12.865
16	-10.2956	-9.89372	-9.52046	-12.8864	-12.5818	-12.6555
17	-9.39609	-8.86707	-8.74169	-11.7125	-9.91377	-11.2701
18	-5.74849	-5.20704	-5.2097	-8.20543	-8.02303	-8.25462
19	-9.8622	-9.2991	-9.16154	-11.7201	-9.98434	-11.3543
20	-8.85748	-8.25862	-8.29719	-10.6722	-10.5716	-10.3904
21	-6.6689	-6.62538	-6.23576	-6.38174	-6.04265	-5.9443
22	-6.09327	-5.39959	-5.94254	-8.02016	-8.36273	-8.37257
23	-10.9649	-11.0888	-10.5935	-12.8292	-12.8857	-12.8839
24	-8.81126	-8.82169	-8.90624	-12.666	-12.855	-13.0064
25	-12.2236	-11.3907	-10.8249	-16.4023	-16.0495	-15.5216
26	-13.0756	-13.1564	-11.9356	-15.1824	-16.8038	-15.7764
27	-9.09944	-8.59697	-8.68911	-11.3287	-10.8043	-10.9699
28	-8.94441	-8.44595	-8.56067	-11.2046	-11.0455	-10.8504
29	-8.37009	-8.03177	-7.96415	-9.6523	-9.55588	-9.55692
30	-9.87815	-9.89271	-9.71555	-11.1511	-11.1051	-10.9572
31	-9.98354	-10.667	-10.3568	-12.4756	-12.6298	-12.9773
32	-8.26618	-8.13999	-8.14912	-9.58317	-9.6415	-9.68564
33	-8.91761	-8.26258	-7.58882	-10.1054	-9.59623	-9.52565
34	-6.20683	-6.21071	-6.33773	-10.9571	-10.981	-11.2854
35	-11.4604	-11.1363	-11.1238	-14.9924	-14.7632	-14.9661
36	-8.8976	-8.77668	-8.46731	-8.80105	-8.5268	-8.90078
37	-11.9641	-12.4068	-9.33865	-13.8917	-15.3132	-15.2014
38	-8.70878	-8.41402	-8.48746	-12.821	-12.8021	-12.4036
39	-12.896	-10.8956	-10.9056	-11.9158	-12.2151	-13.4652
40	-10.2457	-11.0929	-8.53045	-12.3192	-12.0899	-12.9829
41	-9.35879	-9.10566	-8.84584	-12.3993	-12.393	-12.1578
42	-8.62183	-8.88057	-8.81056	-12.599	-12.6764	-12.7004
43	-8.70217	-8.16777	-8.08274	-9.93298	-9.78803	-9.71585
44	-9.65819	-9.35771	-9.33937	-11.3307	-11.007	-11.3044
45	-9.52408	-8.96767	-9.00861	-11.5335	-11.1715	-10.8734
46	-8.41989	-9.84503	-9.8146	-12.1879	-12.0294	-12.3317
47	-11.4506	-11.5677	-10.8038	-14.6478	-14.8788	-14.8603
48	-8.79594	-8.37421	-8.51667	-11.4484	-11.1384	-10.977
49	-9.11817	-8.66606	-8.75601	-11.3628	-11.1561	-11.0385
50	-10.3176	-10.4516	-10.5568	-11.3775	-11.2691	-10.7108
51	-10.3887	-10.4509	-10.1828	-12.3205	-12.3755	-12.1491
52	-9.91285	-9.64689	-9.82115	-11.3943	-11.2478	-11.1687
53	-9.92017	-9.72772	-9.78404	-10.9176	-10.7804	-10.5006
54	-13.0193	-11.99	-13.3196	-11.8599	-12.5532	-12.1359
55	-9.53315	-9.00227	-8.94072	-11.5293	-11.2655	-11.0415
56	-9.16897	-8.77258	-8.62285	-11.4488	-9.58848	-10.9203
57	-12.1361	-11.7147	-11.73	-14.2639	-14.4031	-14.4221
58	-8.91885	-8.67528	-8.10042	-11.5806	-11.1704	-11.5454
59	-10.2393	-9.62969	-9.95419	-13.6502	-13.9243	-13.4615
60	-9.34885	-8.86861	-8.68212	-12.0589	-10.2692	-11.666
61	-9.83509	-9.47031	-9.00799	-12.2845	-11.9966	-12.0367
62	-8.9807	-8.58435	-8.28912	-11.1876	-11.4216	-11.5229
63	-8.5696	-8.25853	-8.24645	-9.86307	-9.82494	-9.77524
64	-10.8371	-9.91047	-9.63198	-11.7231	-10.841	-10.0672
65	-11.4061	-10.9264	-11.2664	-11.9886	-11.8547	-12.1328
66	-9.17467	-8.89121	-8.83849	-11.5069	-11.2331	-11.5174
67	-8.77374	-8.58535	-8.53013	-9.95886	-9.93164	-9.88859
68	-10.054	-9.70434	-8.79207	-12.0001	-11.4733	-11.7888
69	-9.32563	-9.02029	-8.58453	-12.1075	-11.8104	-11.9945
70	-9.14701	-8.61248	-8.61706	-11.0062	-10.7905	-10.612
71	-8.67978	-8.6547	-8.27985	-11.5545	-11.3768	-11.3634
72	-8.81869	-8.97674	-8.54622	-13.7074	-13.8852	-13.7643
73	-10.1506	-9.61633	-9.70367	-9.75398	-10.0033	-9.95077
74	-10.7505	-10.0185	-9.49509	-11.9132	-10.378	-12.1793
75	-13.7552	-13.0119	-12.9107	-11.7597	-12.2208	-10.449
76	-9.15777	-9.01923	-8.56152	-11.9829	-11.8375	-11.8717
77	-8.85963	-8.56914	-8.29552	-11.9183	-11.5729	-11.9821
78	-9.12617	-8.82987	-8.64454	-11.6501	-11.2952	-11.6654
79	-9.16914	-8.86095	-8.8591	-11.6272	-11.2897	-11.656
80	-9.02456	-8.32062	-8.42148	-11.192	-9.39701	-10.6953
81	-9.18135	-8.94877	-9.24628	-9.92402	-9.89063	-10.2602
82	-8.74582	-8.32008	-8.28678	-10.274	-10.1645	-10.0781
83	-9.36901	-8.83415	-8.72958	-11.5088	-10.0159	-11.0824
84	-8.71895	-8.49298	-7.99824	-11.8676	-11.7305	-11.7525
85	-9.07152	-8.77879	-8.40609	-11.8889	-11.5813	-11.8311
86	-9.02947	-8.52347	-8.54865	-11.2669	-10.3898	-10.8341
87	-10.9102	-11.3568	-11.2389	-10.6453	-11.0527	-10.7315
88	-9.57587	-9.07443	-8.82045	-12.1428	-10.3298	-11.7147
89	-9.16133	-8.982	-9.07017	-10.8647	-10.8597	-10.8056
90	-9.21345	-8.70401	-8.62159	-11.0404	-10.7797	-10.7275
91	-11.9679	-11.3705	-10.3841	-9.64058	-10.6023	-10.6816
92	-6.36889	-6.83772	-6.31455	-10.928	-10.0173	-9.86641
93	-9.57359	-7.63395	-8.51364	-11.6026	-11.6244	-11.5308
94	-8.93833	-8.65692	-8.37632	-11.7575	-11.4399	-11.755
95	-9.02506	-8.68626	-8.62829	-11.7936	-11.4362	-11.8389
96	-9.11105	-9.04197	-8.95015	-10.4364	-10.4491	-10.3752
97	-9.51887	-9.14007	-9.32512	-11.7579	-11.6609	-11.5991
98	-8.6215	-7.73189	-8.56429	-11.7941	-11.6089	-11.7089
99	-8.99739	-8.48562	-8.45868	-10.664	-10.4705	-10.3156
100	-7.70734	-7.64455	-7.26383	-13.1605	-13.3479	-13.7855
Note:the expression were presented as -Δ cycle threshold

## Sheet: Tumor size
Table S2b：The correllation between circ-GALNT16 expression and tumor size
patient	<5cm			patient	>5cm
2	-11.3212	-10.159	-10.9096	1	-16.5023	-18.3065	-16.9107
3	-4.77308	-6.5287	-6.61034	4	-13.9872	-14.2893	-13.802
5	-13.6522	-13.8985	-12.292	6	-13.6417	-13.4556	-13.3836
8	-10.9728	-10.4677	-10.5834	7	-11.6755	-13.8667	-10.3397
9	-8.52956	-8.62729	-8.92123	10	-14.1212	-15.7704	-14.1553
11	-8.95131	-9.02682	-8.91164	23	-12.8292	-12.8857	-12.8839
12	-9.47471	-9.56772	-9.52736	24	-12.666	-12.855	-13.0064
13	-13.0415	-12.3113	-12.706	25	-16.4023	-16.0495	-15.5216
14	-13.3484	-13.1788	-13.2149	26	-15.1824	-16.8038	-15.7764
15	-12.9442	-13.0592	-12.865	27	-11.3287	-10.8043	-10.9699
16	-12.8864	-12.5818	-12.6555	28	-11.2046	-11.0455	-10.8504
17	-11.7125	-9.91377	-11.2701	30	-11.1511	-11.1051	-10.9572
18	-8.20543	-8.02303	-8.25462	34	-10.9571	-10.981	-11.2854
19	-11.7201	-9.98434	-11.3543	35	-14.9924	-14.7632	-14.9661
20	-10.6722	-10.5716	-10.3904	37	-13.8917	-15.3132	-15.2014
21	-6.38174	-6.04265	-5.9443	39	-11.9158	-12.2151	-13.4652
22	-8.02016	-8.36273	-8.37257	40	-12.3192	-12.0899	-12.9829
29	-9.6523	-9.55588	-9.55692	41	-12.3993	-12.393	-12.1578
31	-12.4756	-12.6298	-12.9773	44	-11.3307	-11.007	-11.3044
32	-9.58317	-9.6415	-9.68564	45	-11.5335	-11.1715	-10.8734
33	-10.1054	-9.59623	-9.52565	47	-14.6478	-14.8788	-14.8603
36	-8.80105	-8.5268	-8.90078	52	-11.3943	-11.2478	-11.1687
38	-12.821	-12.8021	-12.4036	54	-12.1879	-12.0294	-12.3317
42	-12.599	-12.6764	-12.7004	55	-11.5293	-11.2655	-11.0415
43	-9.93298	-9.78803	-9.71585	57	-14.2639	-14.4031	-14.4221
46	-12.1879	-12.0294	-12.3317	58	-11.5806	-11.1704	-11.5454
48	-11.4484	-11.1384	-10.977	59	-13.6502	-13.9243	-13.4615
49	-11.3628	-11.1561	-11.0385	62	-11.1876	-11.4216	-11.5229
50	-11.3775	-11.2691	-10.7108	66	-11.5069	-11.2331	-11.5174
51	-12.3205	-12.3755	-12.1491	67	-9.95886	-9.93164	-9.88859
53	-10.9176	-10.7804	-10.5006	68	-12.0001	-11.4733	-11.7888
56	-11.4488	-9.58848	-10.9203	71	-11.5545	-11.3768	-11.3634
60	-12.0589	-10.2692	-11.666	72	-13.7074	-13.8852	-13.7643
61	-12.2845	-11.9966	-12.0367	74	-11.9132	-10.378	-12.1793
63	-9.86307	-9.82494	-9.77524	75	-11.7597	-12.2208	-10.449
64	-11.7231	-10.841	-10.0672	78	-11.6501	-11.2952	-11.6654
65	-11.9886	-11.8547	-12.1328	79	-11.6272	-11.2897	-11.656
69	-12.1075	-11.8104	-11.9945	83	-11.5088	-10.0159	-11.0824
70	-11.0062	-10.7905	-10.612	86	-11.2669	-10.3898	-10.8341
73	-9.75398	-10.0033	-9.95077	87	-10.6453	-11.0527	-10.7315
76	-11.9829	-11.8375	-11.8717	89	-10.8647	-10.8597	-10.8056
77	-11.9183	-11.5729	-11.9821	93	-11.6026	-11.6244	-11.5308
80	-11.192	-9.39701	-10.6953	94	-11.7575	-11.4399	-11.755
81	-9.92402	-9.89063	-10.2602	97	-11.7579	-11.6609	-11.5991
82	-10.274	-10.1645	-10.0781	100	-13.1605	-13.3479	-13.7855
84	-11.8676	-11.7305	-11.7525
85	-11.8889	-11.5813	-11.8311
88	-12.1428	-10.3298	-11.7147
90	-11.0404	-10.7797	-10.7275
91	-9.64058	-10.6023	-10.6816
92	-10.928	-10.0173	-9.86641
95	-11.7936	-11.4362	-11.8389
96	-10.4364	-10.4491	-10.3752
98	-11.7941	-11.6089	-11.7089
99	-10.664	-10.4705	-10.3156
Note:the expression were presented as -Δ cycle threshold

## Sheet: Tumor stage
Table S2c
The correllation between circ-GALNT16 expression and tumor size
patient	I+II			patient	III+IV
3	-4.77308	-6.5287	-6.61034	1	-16.5023	-18.3065	-16.9107
5	-13.6522	-13.8985	-12.292	2	-11.3212	-10.159	-10.9096
7	-11.6755	-13.8667	-10.3397	4	-13.9872	-14.2893	-13.802
9	-8.52956	-8.62729	-8.92123	6	-13.6417	-13.4556	-13.3836
11	-8.95131	-9.02682	-8.91164	8	-10.9728	-10.4677	-10.5834
12	-9.47471	-9.56772	-9.52736	10	-14.1212	-15.7704	-14.1553
16	-12.8864	-12.5818	-12.6555	13	-13.0415	-12.3113	-12.706
18	-8.20543	-8.02303	-8.25462	14	-13.3484	-13.1788	-13.2149
20	-10.6722	-10.5716	-10.3904	15	-12.9442	-13.0592	-12.865
21	-6.38174	-6.04265	-5.9443	17	-11.7125	-9.91377	-11.2701
23	-12.8292	-12.8857	-12.8839	19	-11.7201	-9.98434	-11.3543
24	-12.666	-12.855	-13.0064	22	-8.02016	-8.36273	-8.37257
27	-11.3287	-10.8043	-10.9699	25	-16.4023	-16.0495	-15.5216
28	-11.2046	-11.0455	-10.8504	26	-15.1824	-16.8038	-15.7764
29	-9.6523	-9.55588	-9.55692	31	-12.4756	-12.6298	-12.9773
30	-11.1511	-11.1051	-10.9572	35	-14.9924	-14.7632	-14.9661
32	-9.58317	-9.6415	-9.68564	36	-8.80105	-8.5268	-8.90078
33	-10.1054	-9.59623	-9.52565	37	-13.8917	-15.3132	-15.2014
34	-10.9571	-10.981	-11.2854	38	-12.821	-12.8021	-12.4036
39	-11.9158	-12.2151	-13.4652	42	-12.599	-12.6764	-12.7004
40	-12.3192	-12.0899	-12.9829	47	-14.6478	-14.8788	-14.8603
41	-12.3993	-12.393	-12.1578	48	-11.4484	-11.1384	-10.977
43	-9.93298	-9.78803	-9.71585	49	-11.3628	-11.1561	-11.0385
44	-11.3307	-11.007	-11.3044	50	-11.3775	-11.2691	-10.7108
45	-11.5335	-11.1715	-10.8734	51	-12.3205	-12.3755	-12.1491
46	-12.1879	-12.0294	-12.3317	54	-12.1879	-12.0294	-12.3317
52	-11.3943	-11.2478	-11.1687	57	-14.2639	-14.4031	-14.4221
53	-10.9176	-10.7804	-10.5006	58	-11.5806	-11.1704	-11.5454
55	-11.5293	-11.2655	-11.0415	59	-13.6502	-13.9243	-13.4615
56	-11.4488	-9.58848	-10.9203	60	-12.0589	-10.2692	-11.666
62	-11.1876	-11.4216	-11.5229	61	-12.2845	-11.9966	-12.0367
63	-9.86307	-9.82494	-9.77524	65	-11.9886	-11.8547	-12.1328
64	-11.7231	-10.841	-10.0672	67	-9.95886	-9.93164	-9.88859
66	-11.5069	-11.2331	-11.5174	69	-12.1075	-11.8104	-11.9945
68	-12.0001	-11.4733	-11.7888	76	-11.9829	-11.8375	-11.8717
70	-11.0062	-10.7905	-10.612	77	-11.9183	-11.5729	-11.9821
71	-11.5545	-11.3768	-11.3634	84	-11.8676	-11.7305	-11.7525
72	-13.7074	-13.8852	-13.7643	85	-11.8889	-11.5813	-11.8311
73	-9.75398	-10.0033	-9.95077	88	-12.1428	-10.3298	-11.7147
74	-11.9132	-10.378	-12.1793	90	-11.0404	-10.7797	-10.7275
75	-11.7597	-12.2208	-10.449	98	-11.7941	-11.6089	-11.7089
78	-11.6501	-11.2952	-11.6654
79	-11.6272	-11.2897	-11.656
80	-11.192	-9.39701	-10.6953
81	-9.92402	-9.89063	-10.2602
82	-10.274	-10.1645	-10.0781
83	-11.5088	-10.0159	-11.0824
86	-11.2669	-10.3898	-10.8341
87	-10.6453	-11.0527	-10.7315
89	-10.8647	-10.8597	-10.8056
91	-9.64058	-10.6023	-10.6816
92	-10.928	-10.0173	-9.86641
93	-11.6026	-11.6244	-11.5308
94	-11.7575	-11.4399	-11.755
95	-11.7936	-11.4362	-11.8389
96	-10.4364	-10.4491	-10.3752
97	-11.7579	-11.6609	-11.5991
99	-10.664	-10.4705	-10.3156
100	-13.1605	-13.3479	-13.7855
Note:the expression were presented as -Δ cycle threshold

## Sheet: N stage
Table S2d
The correllation between circ-GALNT16 expression and lymphatic node metastasis
patient	N0			patient	N1+N2
3	-4.77308	-6.5287	-6.61034	1	-16.5023	-18.3065	-16.9107
5	-13.6522	-13.8985	-12.292	2	-11.3212	-10.159	-10.9096
6	-13.6417	-13.4556	-13.3836	4	-13.9872	-14.2893	-13.802
7	-11.6755	-13.8667	-10.3397	8	-10.9728	-10.4677	-10.5834
9	-8.52956	-8.62729	-8.92123	10	-14.1212	-15.7704	-14.1553
11	-8.95131	-9.02682	-8.91164	13	-13.0415	-12.3113	-12.706
12	-9.47471	-9.56772	-9.52736	14	-13.3484	-13.1788	-13.2149
16	-12.8864	-12.5818	-12.6555	15	-12.9442	-13.0592	-12.865
18	-8.20543	-8.02303	-8.25462	17	-11.7125	-9.91377	-11.2701
20	-10.6722	-10.5716	-10.3904	19	-11.7201	-9.98434	-11.3543
21	-6.38174	-6.04265	-5.9443	22	-8.02016	-8.36273	-8.37257
23	-12.8292	-12.8857	-12.8839	25	-16.4023	-16.0495	-15.5216
24	-12.666	-12.855	-13.0064	26	-15.1824	-16.8038	-15.7764
27	-11.3287	-10.8043	-10.9699	31	-12.4756	-12.6298	-12.9773
28	-11.2046	-11.0455	-10.8504	35	-14.9924	-14.7632	-14.9661
29	-9.6523	-9.55588	-9.55692	36	-8.80105	-8.5268	-8.90078
30	-11.1511	-11.1051	-10.9572	37	-13.8917	-15.3132	-15.2014
32	-9.58317	-9.6415	-9.68564	38	-12.821	-12.8021	-12.4036
33	-10.1054	-9.59623	-9.52565	42	-12.599	-12.6764	-12.7004
34	-10.9571	-10.981	-11.2854	47	-14.6478	-14.8788	-14.8603
39	-11.9158	-12.2151	-13.4652	48	-11.4484	-11.1384	-10.977
40	-12.3192	-12.0899	-12.9829	49	-11.3628	-11.1561	-11.0385
41	-12.3993	-12.393	-12.1578	50	-11.3775	-11.2691	-10.7108
43	-9.93298	-9.78803	-9.71585	51	-12.3205	-12.3755	-12.1491
44	-11.3307	-11.007	-11.3044	54	-12.1879	-12.0294	-12.3317
45	-11.5335	-11.1715	-10.8734	57	-14.2639	-14.4031	-14.4221
46	-12.1879	-12.0294	-12.3317	58	-11.5806	-11.1704	-11.5454
52	-11.3943	-11.2478	-11.1687	59	-13.6502	-13.9243	-13.4615
53	-10.9176	-10.7804	-10.5006	61	-12.2845	-11.9966	-12.0367
55	-11.5293	-11.2655	-11.0415	65	-11.9886	-11.8547	-12.1328
56	-11.4488	-9.58848	-10.9203	67	-9.95886	-9.93164	-9.88859
60	-12.0589	-10.2692	-11.666	69	-12.1075	-11.8104	-11.9945
62	-11.1876	-11.4216	-11.5229	76	-11.9829	-11.8375	-11.8717
63	-9.86307	-9.82494	-9.77524	77	-11.9183	-11.5729	-11.9821
64	-11.7231	-10.841	-10.0672	84	-11.8676	-11.7305	-11.7525
66	-11.5069	-11.2331	-11.5174	85	-11.8889	-11.5813	-11.8311
68	-12.0001	-11.4733	-11.7888	88	-12.1428	-10.3298	-11.7147
70	-11.0062	-10.7905	-10.612	90	-11.0404	-10.7797	-10.7275
71	-11.5545	-11.3768	-11.3634	98	-11.7941	-11.6089	-11.7089
72	-13.7074	-13.8852	-13.7643
73	-9.75398	-10.0033	-9.95077
74	-11.9132	-10.378	-12.1793
75	-11.7597	-12.2208	-10.449
78	-11.6501	-11.2952	-11.6654
79	-11.6272	-11.2897	-11.656
80	-11.192	-9.39701	-10.6953
81	-9.92402	-9.89063	-10.2602
82	-10.274	-10.1645	-10.0781
83	-11.5088	-10.0159	-11.0824
86	-11.2669	-10.3898	-10.8341
87	-10.6453	-11.0527	-10.7315
89	-10.8647	-10.8597	-10.8056
91	-9.64058	-10.6023	-10.6816
92	-10.928	-10.0173	-9.86641
93	-11.6026	-11.6244	-11.5308
94	-11.7575	-11.4399	-11.755
95	-11.7936	-11.4362	-11.8389
96	-10.4364	-10.4491	-10.3752
97	-11.7579	-11.6609	-11.5991
99	-10.664	-10.4705	-10.3156
100	-13.1605	-13.3479	-13.7855
Note:the expression were presented as -Δ cycle threshold
