# Supplementary material for: Circ-GALNT16 restrains colorectal cancer progression by enhancing the SUMOylation of hnRNPK
Source: J Exp Clin Cancer Res. 2021 Aug 27;40:272. doi: 10.1186/s13046-021-02074-7 (PMC8400830; doi:10.1186/s13046-021-02074-7)
Supplement: Supplementary file 13 — Additional file 13: Table S3. Primers, shRNAs, siRNAs, and probes used in this study. [file 13046_2021_2074_MOESM13_ESM.xlsx]

## Sheet: Primers
Table.S3
qRT-PCR Primers
hsa_circ_0102495	Forward Primer	CACCATCCCGCTCATTGAC
	Reverse Primer	ATCTTCCTCATGGTGGGCAGA
hsa_circ_0008234	Forward Primer	AACCCACATGCCTCTACCAA
	Reverse Primer	AGGTGTCATCATAGCCACTGA
hsa_circ_0044621	Forward Primer	CCCTAGGAACTCAGTCCTGTACTCT
	Reverse Primer	TGAGATGGAGTCTCGCTCTGTCTAC
hsa_circ_052184	Forward Primer	AGAATCGGAAGAGCCAGACG
	Reverse Primer	CTGGACTCCTGGCTGCG
hsa_circ_0055087	Forward Primer	CTGCTTCAGGATTCAATGCCA
	Reverse Primer	GCCACCCAAGCAGAAGTTC
hsa_circ_0124554	Forward Primer	ACAGCTCTCAGTCCACACTC
	Reverse Primer	AATTGTCAGAAGGCCTTGGC
hsa_circ_0006457	Forward Primer	CCAACCATTGTCACACAAGCAC
	Reverse Primer	CTCGGATCTGCTGAGTTCCAATT
hsa_circ_0010620	Forward Primer	CCACGTAGAGCTGGCTGAT
	Reverse Primer	CCCAGTTACTGTGACCGTGA
hsa_circ_0046136	Forward Primer	CATCTTCGGCATGTCCTTCG
	Reverse Primer	CACCTGAAACCCGAACAGC
hsa_circ_0138252	Forward Primer	TCATTCGGGCCCTTCATCAC
	Reverse Primer	ACCCTGTGATGCTGTGTCA
hsa_circ_0102495 convergent primers	Forward Primer	CGCGAGCGAAAACAAACAG
	Reverse Primer	TACGGTCAGGATGGCGATG
GALNT16	Forward Primer	ATCGCCATCCTGACCGTAG
	Reverse Primer	CAAAGCCTTTCGAGGGAGTTC
GAPDH	Forward Primer	TCAAGGCTGAGAACGGGAAG
	Reverse Primer	TGATGATCTTGAGGCTGTTGTC
GAPDH divergent primers	Forward Primer	TGTACCATCAATAAAGTACCCTGTG
	Reverse Primer	AAATCCGTTGACTCCGACCT
18s	Forward Primer	ACACGGACAGGATTGACAGA
	Reverse Primer	GGACATCTAAGGGCATCACA
U6	Forward Primer	CTCGCTTCGGCAGCACA
	Reverse Primer	AACGCTTCACGAATTTGCGT
SENP2	Forward Primer	TGAGGCGTCCCCATTGTACT
	Reverse Primer	CAGAGTTTCCATGACCACTTTCT
hnRNPK	Forward Primer	GCAGGAGGAATTATTGGGGTC
	Reverse Primer	TGCACTCTACAACCCTATCGG
Serpine1	Forward Primer	CATCCTGGAACTGCCCTAC
	Reverse Primer	CAGCCTGAAACTGTCTGAAC
SAA2	Forward Primer	TTTTCTGCTCCTTGGTCC
	Reverse Primer	CCGATGTAATTGGCTTCTC
CCL20	Forward Primer	ACCGTATTCTTCATCCTAA
	Reverse Primer	TTCACCCAAGTCTGTTTT
CXCL8	Forward Primer	TTGCCAAGGAGTGCTAAA
	Reverse Primer	AACCCTCTGCACCCAGTT
FOSB	Forward Primer	CTTGTGCAACCCACCCTCA
	Reverse Primer	GCCACTGCTGTAGCCACTCAT
LCN2	Forward Primer	TCACCTCCGTCCTGTTTA
	Reverse Primer	CTCCTTGGTTCTCCCGTA
IL10R	Forward Primer	CCTCCGTCTGTGTGGTTTGAA
	Reverse Primer	CACTGCGGTAAGGTCATAGGA
TMEM74B	Forward Primer	AGAGGAGCATGAGACCCATTT
	Reverse Primer	AGGGCGGAAACAAAGCCAT
KCNN4	Forward Primer	AAGCTCCGGGAACAAGTGAAC
	Reverse Primer	CGCCAGCGTGTCAATCTGT
CDKN1A	Forward Primer	TGTCCGTCAGAACCCATGC
	Reverse Primer	AAAGTCGAAGTTCCATCGCTC
ChIP Primers
Serpine1 ChIP	Forward Primer	CAGCCCACCATGTTCTCCACTGA
	Reverse Primer	CACCACCCCTGTGGATCCTGTA
CDKN1A ChIP	Forward Primer	CTGGACTGGGCACTCTTGTC
	Reverse Primer	CTCCTACCATCCCCTTCCTC
short hairpin RNAs (shRNAs) sequence
sh-circ-GALNT16#1	sense	5'-CCGGCTCATTGACTGAGCAGCTATTCTCGAGTAGCTGCTCAGTCAATGAGTTTTTTT-3'
	antisense	5'-AATTCAAAAACTCATTGACTGAGCAGCTATTCTCGAGTAGCTGCTCAGTCAATGAGTT-3'
sh-circ-GALNT16#2	sense	5'-CCGGCCCGCTCATTGACTGAGCATTCTCGAGTGCTCAGTCAATGAGCGGGTTTTTTT-3'
	antisense	5'-AATTCAAAAACCCGCTCATTGACTGAGCATTCTCGAGTGCTCAGTCAATGAGCGGGTT-3'
sh-circ-GALNT16#3	sense	5'-CCGGGCACCATCCCGCTCATTGATTCTCGAG TCAATGAGCGGGATGGTGCTTTTTTT-3'
	antisense	5'-AATTCAAAAA GCACCATCCCGCTCATTGATT CTCGAG TCAATGAGCGGGATGGTGCTT -3'
small interfere RNA
hnRNPK		5′ -TGGCATTTGTATTGATAGTTA-3′
SENP2		5′ -GCGAATTACTCGAGGAGAT-3′
Serpine1		5′-GCTGACTTCACGAGTCTTT-3′
Pull Down probe sequence
has_circ_0102495(3bio)_Probe		TAGCTGCTCAGTCAATGAGC-/3bio/
has_circ_0102495(3bio)_scramble		CGGTACCAGATACTAGTCTG-/3bio/
